1 **Upregulated Ca<sup>2+</sup> release from the endoplasmic reticulum leads to**  
2 **impaired presynaptic function in Alzheimer's disease**

3 Temitope Adeoye<sup>1</sup>, Syed I Shah<sup>1</sup>, Angelo Demuro<sup>2</sup>, David A Rabson<sup>1</sup>, and Ghanim Ullah<sup>1,\*</sup>

4 <sup>1</sup>Department of Physics, University of South Florida, Tampa, FL 33620.

5 <sup>2</sup>Department of Neurobiology and Behaviour University of California, Irvine, CA 92697.

6 \*Correspondence: [gullah@usf.edu](mailto:gullah@usf.edu)

## 7 **Abstract**

8 Neurotransmitter release from presynaptic terminals is primarily regulated by rapid  $\text{Ca}^{2+}$  influx  
9 through membrane-resident voltage-gated  $\text{Ca}^{2+}$  channels (VGCCs). Also, accumulating  
10 evidence indicates that the endoplasmic reticulum (ER) is extensively present in axonal  
11 terminals of neurons and plays a modulatory role in synaptic transmission by regulating  $\text{Ca}^{2+}$   
12 levels. Alzheimer's disease (AD) is marked by enhanced  $\text{Ca}^{2+}$  release from the ER and  
13 downregulation of  $\text{Ca}^{2+}$  buffering proteins. However, the precise consequence of impaired  $\text{Ca}^{2+}$   
14 signalling within the vicinity of VGCCs (active zone (AZ)) on exocytosis is poorly understood.  
15 Here, we perform in-silico experiments of intracellular  $\text{Ca}^{2+}$  signalling and exocytosis in a  
16 detailed biophysical model of hippocampal synapses to investigate the effect of aberrant  $\text{Ca}^{2+}$   
17 signalling on neurotransmitter release in AD. Our model predicts that enhanced  $\text{Ca}^{2+}$  release  
18 from the ER increases the probability of neurotransmitter release in AD. Moreover, over very  
19 short timescales (30-60 msec), the model exhibits activity-dependent and enhanced short-term  
20 plasticity in AD, indicating neuronal hyperactivity—a hallmark of the disease. Similar to  
21 previous observations in AD animal models, our model reveals that during prolonged  
22 stimulation (~450 msec), pathological  $\text{Ca}^{2+}$  signalling increases depression and  
23 desynchronization with stimulus, causing affected synapses to operate unreliably. Overall, our  
24 work provides direct evidence in support of a crucial role played by altered  $\text{Ca}^{2+}$  homeostasis  
25 mediated by intracellular stores in AD.

26

## 27 **Introduction**

28 Alzheimer's disease (AD) is the most common and burdensome of the late-onset degenerative  
29 dementias: the world Alzheimer report estimated a global prevalence of over 50 million  
30 worldwide, a number expected to triple by 2050 [85, 86]. AD manifests as progressive memory  
31 impairment initially and faster rate of cognitive decline and neurodegeneration in later stages.  
32 Despite the convoluted etiology of AD, experimental and theoretical investigation suggests  
33 that synapses are the primary targets in the early stage of the disease [87, 88]. Histologically,  
34 the AD brain is marked by extracellular deposition of senile beta-amyloid (A $\beta$ ) plaques—the  
35 result of abnormalities in the genes encoding amyloid precursor protein (APP) or  
36 intramembrane protease presenilin 1 and 2 (PS1, PS2). These are accompanied by intracellular  
37 accumulation of neurofibrillary tangles (NFTs)—composed of hyperphosphorylated tau  
38 proteins (pTau)—that litter the cerebral and hippocampal cortices [89—93]. Although the  
39 exact mechanism is still being debated, numerous experimental studies implicate elevated  
40 intracellular Ca<sup>2+</sup> levels as one of the main mechanisms underlying A $\beta$  toxicity [94, 95]. These  
41 studies show that the AD brain is surfeit with dysregulation of Ca<sup>2+</sup> signalling pathways [94—  
42 97], motivating researchers to propose the Ca<sup>2+</sup> hypothesis of AD and aging [126]. Indeed, it  
43 has been shown that both intra- and extracellular A $\beta$  oligomers and familial AD (FAD)-causing  
44 mutations in presenilin cause enhanced Ca<sup>2+</sup> release from the ER through inositol (1, 4, 5)-  
45 triphosphate (IP<sub>3</sub>) receptors (IP<sub>3</sub>Rs) and/or ryanodine receptors (RyRs) [16, 17, 94—100,  
46 127—129]. This upregulated Ca<sup>2+</sup> release can contribute to aberrant plasticity and functional  
47 disruption of neuronal networks [44, 95].

48  
49 Intracellular Ca<sup>2+</sup> is an important second messenger for regulating a multitude of neuronal  
50 functions, including neurotransmitter release. Synaptic function at nerve terminals is tightly  
51 coupled to intracellular Ca<sup>2+</sup> concentration ([Ca<sup>2+</sup>]), as Ca<sup>2+</sup> primarily regulates the biological  
52 machinery responsible for exocytosis and short-term plasticity [28, 29]. The precise temporal  
53 control of synaptic transmission by Ca<sup>2+</sup> is achieved via local signal transduction mechanisms  
54 that aim to regulate Ca<sup>2+</sup> excitability at the axonal bouton. Voltage-gated Ca<sup>2+</sup> channels  
55 (VGCCs) are the primary mediators of the transduction of depolarization-induced Ca<sup>2+</sup>  
56 transients into neurotransmitter release. Furthermore, Ca<sup>2+</sup> influx through VGCCs leads to  
57 physiological events that alter plasma membrane functions underpinning synaptic plasticity,  
58 protein expression, spine maintenance, and regulation of excitability in excitatory synapses  
59 [45, 46]. Likewise, investigations of the Ca<sup>2+</sup>-dependence of vesicular release have highlighted

60 the role of intracellular stores in  $\text{Ca}^{2+}$  handling and spontaneous exocytosis [21, 47]. Thus, the  
61 close association between these  $\text{Ca}^{2+}$  pathways, their effect on numerous neuronal processes,  
62 and their high sensitivity to pathological perturbations makes it especially valuable to elucidate  
63 the exact nature of the coupling.

64

65 Extensive evidence supports the presence of the ER in the nerve terminal of CA3 pyramidal  
66 neurons [21, 47, 44, 101—103]. In neurons, activation of  $\text{Ca}^{2+}$ -sensitive channels like  $\text{IP}_3$ R  
67 and RyRs triggers the release of  $\text{Ca}^{2+}$  from the ER. Opening of  $\text{IP}_3$ R primarily depends on  
68  $\text{Ca}^{2+}$  and  $\text{IP}_3$ . To achieve this, glutamate released into the synaptic cleft elicits the production  
69 of  $\text{IP}_3$  by the activation of membrane-bound mGluRs. RyRs activation, on the other hand, is  
70 largely controlled by cytosolic  $[\text{Ca}^{2+}]$ . This specialized cascade underscores the importance of  
71  $\text{IP}_3$ R and RyRs in the regulation of the  $\text{Ca}^{2+}$  induced  $\text{Ca}^{2+}$  release (CICR) mechanism of the  
72 ER. Previous works have shown that CICR is necessary for ER stores to adequately influence  
73 spontaneous vesicle release and homosynaptic plasticity [21, 104]. Indeed, *in vitro* studies  
74 confirm that properly sensitized CICR is necessary for normal synaptic function, whereas  
75 aberrant CICR underlies presynaptic impairment associated with AD [19, 20, 80, 82]. Despite  
76 this evidence, the precise role of ER  $\text{Ca}^{2+}$  handling in action potential (AP)-evoked presynaptic  
77  $\text{Ca}^{2+}$  dynamics and its downstream effect on presynaptic neuronal processes remain unclear  
78 [19—21, 82].

79

80 Information encoding at the CA3 to CA1 synapses in the hippocampus, which is crucial for  
81 learning and memory storage, relies on the spatiotemporal organization of  $\text{Ca}^{2+}$  events leading  
82 up to synaptic transmission [108]. AP arrival at the nerve terminal activates VGCCs, leading  
83 to high-amplitude, short-lived  $\text{Ca}^{2+}$  influx events into the AZ. Coupled with this specialized  
84 pathway,  $\text{Ca}^{2+}$  sensors initiate a heterogeneous fusion of neurotransmitter vesicles with the  
85 plasma membrane that often culminates in either fast synchronous or slow asynchronous  
86 release. Neuronal communication primarily relies on the synchronous mode of exocytosis,  
87 which is regulated by synaptotagmin-1 (*Syt1*) sensors with low  $\text{Ca}^{2+}$  affinity and rapid kinetics  
88 that are critical for the exquisite temporal precision of vesicle fusion that characterizes synaptic  
89 transmission at most CA3-CA1 terminals [37, 62, 105]. Such a high degree of synchrony is in  
90 part achieved by the steep dose dependence of evoked release on the short-lived  $\text{Ca}^{2+}$  transients  
91 constrained to micro- or nanodomains within the vicinity of VGCCs [28, 106]. A global  
92 buildup of  $[\text{Ca}^{2+}]$ , on the other hand, accelerates the recruitment of release-ready vesicles,  
93 controlling the degree of synaptic plasticity [130]. Thus, changes in  $\text{Ca}^{2+}$  signals at the local or

94 global scale are expected to disrupt synaptic transmission and plasticity. Consistent with this  
95 assertion, experimental manipulations that perturb evoked  $\text{Ca}^{2+}$  influx alter the contribution of  
96 the synchronous mode of release to overall exocytosis and compromise synaptic plasticity [38,  
97 39, 107]. These findings highlight the need for a thorough investigation of the potential link  
98 between impaired synaptic function and disrupted  $\text{Ca}^{2+}$  homeostasis in AD.

99

100 In this study, we incorporate findings from extensive experimental and computational studies  
101 to develop a detailed biophysical model of  $\text{Ca}^{2+}$ -driven exocytosis at the CA3 presynaptic  
102 terminal. The model accounts for the observed  $\text{Ca}^{2+}$  and  $\text{IP}_3$  signalling pathways necessary for  
103 intracellular  $\text{Ca}^{2+}$  regulation and integrates the elaborate kinetics of neurotransmitter release—  
104 vesicle docking, mobilization, priming, and fusion—aided by distinct  $\text{Ca}^{2+}$  sensors. We  
105 reproduced crucial statistics of both  $\text{Ca}^{2+}$  and release events reported at small excitatory  
106 synapses, such as transient timescale, amplitude, and decay time. By developing a  
107 mathematical framework for coupling the  $\text{Ca}^{2+}$  domains surrounding the ER and AZ, we study  
108 how AD-associated pathological  $\text{Ca}^{2+}$  release from the ER disrupts presynaptic  
109 neurotransmitter release rates and consequently alter synaptic plasticity and facilitation at  
110 affected synapses. Overall, our work provides novel insights on the pathologic role of aberrant  
111 neuronal  $\text{Ca}^{2+}$  handling on glutamate release and the downstream effects on synaptic  
112 dysfunction and cognitive decline observed in AD.

113

## 114 **Results**

### 115 *The gain-of-function enhancement of $\text{IP}_3\text{R}$ gating in AD*

116 The exaggerated  $\text{Ca}^{2+}$  release observed in familial AD (FAD)-affected neurons is ascribed  
117 mainly to the gain-of-function enhancement of  $\text{IP}_3\text{Rs}$  in the affected cells due to FAD-causing  
118 mutations in presenilin [16, 17, 58, 124, 128]. Indeed, it has been shown that cell models  
119 expressing PS mutations exhibit a several-fold increase in the open probability ( $P_o$ ) of  $\text{IP}_3\text{Rs}$   
120 [17, 58]. Specifically, the  $P_o$  of  $\text{IP}_3\text{R}$  in cortical neurons from 3xTg-AD mice carrying PS  
121 mutations was enhanced by 700% relative to control mice with wildtype (WT) PS ( $0.43 \pm 0.05$   
122 in AD versus  $0.06 \pm 0.01$  in WT mice) at a cytosolic  $[\text{Ca}^{2+}]$  ( $[\text{Ca}^{2+}]_c$ ) of  $1 \mu\text{M}$  and  $\text{IP}_3$   
123 concentration ( $[\text{IP}_3]$ ) of  $10 \mu\text{M}$  [58]. Given that all models for  $\text{IP}_3\text{R}$  in WT or AD-affected cells  
124 are based on non-neuronal cells, we use the above findings to build a new model for the gating

125 kinetics of IP<sub>3</sub>Rs in neurons from WT and 3xTg-AD mice (see details in *Methods* section).  
126 Parameters yielding the best fit to experimental observations are listed in *Table 6*.

127  
128 Our model mimics the gating of IP<sub>3</sub>R in neurons from WT and 3xTg-AD mice (*Fig 1*), closely  
129 reproducing the observed values of the  $P_o$  (*Fig 1A, D*), mean open time ( $\tau_o$ ) (*Fig 1B, E*), and  
130 mean close time ( $\tau_c$ ) (*Fig 1C, F*) reported in [128]. The significantly higher  $P_o$  of the channel  
131 in AD-affected neurons is reflected in the time-traces from the model, showing that the channel  
132 spends significantly more time in the open state in the diseased state (*Fig 1G*). To determine  
133 how the observations about different resting  $[Ca^{2+}]_c$  in AD-affected cells change the behaviour  
134 of IP<sub>3</sub>Rs, we plot the  $P_o$  of the channel as a function of  $[Ca^{2+}]_c$  and  $[IP_3]$  (*Fig. 1H, I*). Previous  
135 studies of 3xTg and APP<sub>SW</sub> AD mice models reported resting  $[Ca^{2+}]_c$  of  $247 \pm 10.1$  nM and  
136  $225.2 \pm 11.7$  nM respectively, whereas  $[Ca^{2+}]_c$  of  $110.8 \pm 1.5$  nM was recorded in WT mice [15].  
137 In particular, cortical neurites of plaque bearing mice express a 6-fold increase in resting  $[Ca^{2+}]_c$   
138 relative to non-transgenic mice [55]. Here, our model exhibits a 4.42-fold increase in  $P_o$  of  
139 IP<sub>3</sub>Rs in WT neurons as we increase  $[Ca^{2+}]_c$  from 110 nM to 250 nM (0.005626 vs 0.02484) at  
140 0.3  $\mu$ M  $[IP_3]$ . At  $[IP_3] = 0.3$   $\mu$ M and  $[Ca^{2+}]_c = 250$  nM,  $P_o$  of the channel in AD-affected neurons  
141 reaches 0.2565—a 10.32-fold increase relative to WT neurons (*Fig 1H, I*). Thus, an IP<sub>3</sub>R in the  
142 AD-affected neurons will exhibit an almost 45-fold increase in  $P_o$  compared to control neurons  
143 with the same amount of IP<sub>3</sub>, leading to a significantly higher  $Ca^{2+}$  release from the ER.

#### 144 ***Characterization of the glutamate release model and release event***

145 We next examine the relationship between total release from a single process following  $[Ca^{2+}]_c$   
146 clamps at different concentration steps. We observe that the release rate rapidly increases and  
147 transiently decays back to basal level within tens of milliseconds—a result of the sensitivity of  
148 the  $Ca^{2+}$  sensors (*Fig 2A*). For comparison, we also show the release rate given by the Allosteric  
149 model at different  $[Ca^{2+}]_c$  values (*Fig. 2B*). Also, we obtain results similar to quantitative  
150 studies of transmission profiles in Calyx-of-Held synapse [1]. Unsurprisingly, we observed a  
151 shift in the  $[Ca^{2+}]_c$  dependency of the peak release rate as the response to clamped intracellular  
152  $Ca^{2+}$  levels is both lower and right-shifted relative to the experimental data for the Calyx-of-  
153 Held (*Fig 2C*), whereas the time delay (time-to-peak) of peak release rate shows higher and  
154 right-shifted exponential decay (*Fig 2D*). This is consistent with observations of approximately  
155 hundred-fold decrease in total vesicle population in hippocampal boutons [2, 3]. In addition,  
156 our model mimics the  $Ca^{2+}$ -dependent increase in peak release rate observed at high fidelity

157 synapses of cerebellar mossy fibre boutons (cMFBs), which permit direct presynaptic  
 158 recordings and are reported to have high structural similarities with their hippocampal  
 159 counterparts (*Fig 2C*) [131, 132]. Moreover, in agreement with previous recordings of  
 160 spontaneous release events from CA3-CA1 synapses, we affirmed that the spontaneous release  
 161 rate elicited by resting level  $[Ca^{2+}]_c$  of 100 nM is within the reported range of  $10^{-4}$  and  $10^{-5}$   
 162 per ms [4, 5, 6]. The Dual-Sensor model is more in line with the findings on CA3-CA1  
 163 synapses, and is used for the remaining of this paper.

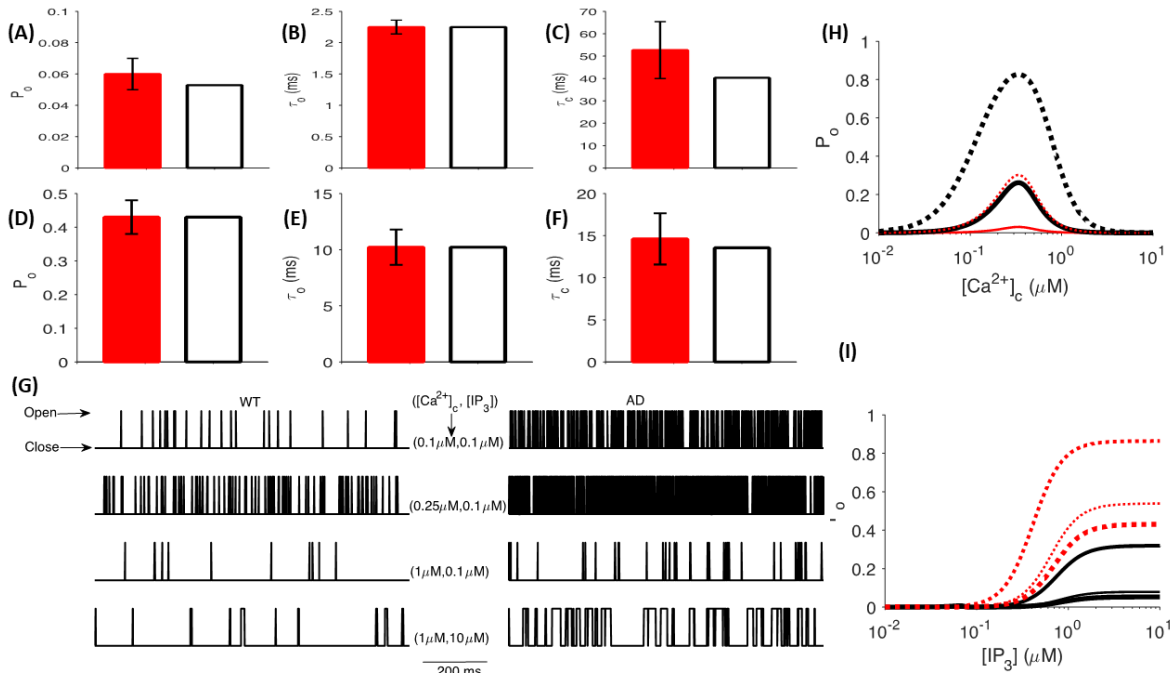

164

165 **Figure 1.** Gain-of-function enhancement of  $IP_3R$  gating in AD. The  $P_o$  (A, D),  $\tau_o$  (B, E), and  
 166  $\tau_c$  (C, F) of  $IP_3R$  given by the model (empty bars) and observed values in primary cortical  
 167 neurons from WT (A-C) and 3xTg AD mice (filled bars) (D-F) at  $[Ca^{2+}]_c = 1 \mu M$  and  $[IP_3] =$   
 168  $10 \mu M$ . (G) Sample time-traces generated by stochastically simulating a single  $IP_3R$  channel in  
 169 cortical neurons from WT (left column) and AD (right column) mice at different  $[Ca^{2+}]_c$  and  
 170  $[IP_3]$  values shown in the figure. (H)  $P_o$  of  $IP_3R$  as a function of  $[Ca^{2+}]_c$  at  $[IP_3] = 0.3 \mu M$  (thin  
 171 lines) and  $1 \mu M$  (thick lines) in WT (solid lines) and AD-affected (dotted) neurons. (I)  $P_o$  of  
 172  $IP_3R$  as a function of  $[IP_3]$  at  $[Ca^{2+}]_c = 0.1, 0.25,$  and  $1 \mu M$  (the increasing value of  $[Ca^{2+}]_c$  is  
 173 represented by the thickness of the line) in WT (solid lines) and AD-affected (dotted) neurons.  
 174 Experimental values shown for comparison in (A-F) are from [128].

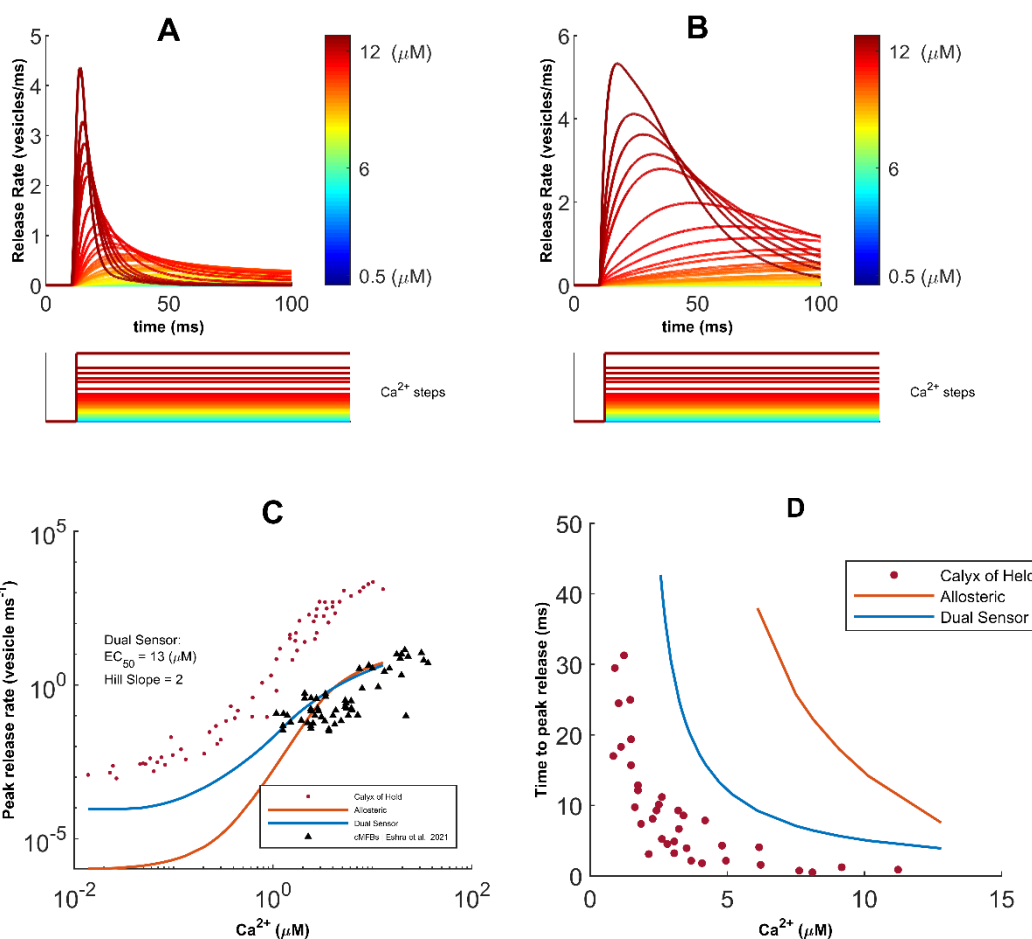

175

176

177 **Figure 2.** *Characterization of neurotransmission in response to  $[Ca^{2+}]_c$  steps.* (A) Total release  
 178 events obtained from a single Dual-Sensor fusion process after clamping  $[Ca^{2+}]_c$  at different  
 179 values. (B) Release profile following Allosteric fusion in response to stepwise  $[Ca^{2+}]_c$  clamp.  
 180 (C) Regulation of the peak release rate in response to clamped  $[Ca^{2+}]_c$  levels show lower and  
 181 right-shifted dose-responses relative to the experimental data for the Calyx-of-Held. (D)  $[Ca^{2+}]_c$   
 182 dependence of time-to-peak rate indicates exponentially decreasing but longer time delay to  
 183 peak release when matched with data for the Calyx-of-Held. Experimental values shown for  
 184 comparison in (C, D) are from [131]

185

### 186 *AD-associated intracellular $Ca^{2+}$ changes enhance neurotransmitter release*

187 Several studies have reported enhanced  $Ca^{2+}$  release from the ER in AD-affected neurons [10—  
 188 14]. This enhanced  $Ca^{2+}$  release has been associated with the several fold increase in the  $P_O$  of  
 189  $IP_3Rs$  observed in multiple animal and human cell models of AD [11, 15—17, 128]. Although  
 190 presynaptic plasticity and synaptic vesicle release (SVR) are tightly coupled to  $Ca^{2+}$  entry  
 191 through VGCCs, several studies have established an important role for ER stores in regulating



192 presynaptic plasticity and neurotransmission [18—22]. Furthermore, strong experimental  
193 evidence supports the existence of a feedback loop between the ER  $\text{Ca}^{2+}$  stores and AP  
194 triggered exocytosis events [7]. Accordingly, here we explore how the observed gain-of-  
195 function enhancement of  $\text{IP}_3\text{Rs}$  in AD affects neurotransmitter release. In addition to enhanced  
196  $\text{Ca}^{2+}$  release through  $\text{IP}_3\text{Rs}$ , multiple studies have implicated a significant downregulation of  
197  $\text{Ca}^{2+}$  buffering proteins in AD-affected neurons as compared to WT neurons [133—135]. We  
198 incorporate the effect of observed changes in  $\text{Ca}^{2+}$  buffering proteins by considering two  
199 configurations: *High Coupling (HC)* and *Normal Coupling (NC)* between the ER and AZ. The  
200 *HC* configuration corresponds to the downregulation of  $\text{Ca}^{2+}$  buffering proteins (see more  
201 details in *Methods* section).

202  
203 In *Fig. 3A*, we show a typical release profile in response to a single AP, where a clear difference  
204 between WT and AD-affected synapses can be seen. To quantify this difference, we compute  
205 the release probability (Pr) by counting the number of vesicles released from the slow and fast  
206 release-ready pool (RRP), divided by the number of vesicles initially in both pools. In AD-  
207 affected synapse, we observe enhanced Pr over a wide range of VGCCs' expressions in dose-  
208 response manner (*Fig 3B*), suggesting that the acute effects of AD-driven aberrant cytosolic  
209  $\text{Ca}^{2+}$  are not exclusive to synapses operating in the regime of sparse VGCCs. Surprisingly, we  
210 observe only a marginal difference in the peak release rate between WT and AD-affected  
211 synapses (*Fig 3C*). We also calculated the number of vesicles released during a single AP by  
212 integrating the rate of vesicle release from the slow and fast RRP, and noticed a significant  
213 increase in vesicles released in the AD-affected synapse (*Fig. 3D*). To discern the contribution  
214 of enhanced  $\text{Ca}^{2+}$  release through  $\text{IP}_3\text{Rs}$  from that due to the *HC*, we simulate four scenarios:  
215 (1) enhanced  $\text{Ca}^{2+}$  release through  $\text{IP}_3\text{Rs}$  but *NC* (AD-NC), (2) enhanced  $\text{Ca}^{2+}$  release through  
216  $\text{IP}_3\text{Rs}$  with *HC* (AD-HC), (3) normal  $\text{Ca}^{2+}$  release through  $\text{IP}_3\text{Rs}$  and *NC* (WT-NC), and (4)  
217 normal  $\text{Ca}^{2+}$  release through  $\text{IP}_3\text{Rs}$  and *HC* (WT-HC). We notice that while *HC* causes a minor  
218 increase in the release probability and vesicles released in the WT synapse, it strongly affects  
219 both these features in the AD-affected synapse (*Supplementary Fig 1A, B*).

220  
221 To gain deeper insight into the observed changes in the Pr, we examine the dependence of the  
222 release rise time (*Time to peak release rate*) on Pr (Pr is increased by increasing the number of  
223 VGCCs as in *Fig 3A*) and observed no significant differences between AD-affected and WT  
224 synapses (*Fig 3E*). Interestingly, the decay time (*Time to basal release rate*) exhibits a biphasic  
225 dependence on Pr with a longer decay time in AD-affected synapse. Strikingly, the decay time

226 as well as the concomitant AD-associated enhancement is attenuated in synapses with both  
227 high and low  $Pr$ , and peaks at  $Pr$  corresponding to physiologically reasonable VGCCs  
228 expression for small hippocampal synapses [35], indicating that such small hippocampal  
229 synapses are more sensitive to alternations due to AD-associated  $Ca^{2+}$  disruptions (*Fig 3F*).  
230 Like the release probability as a function of time and vesicles released during a single AP, HC  
231 has a stronger effect on the release rise time mainly due to the changes in  $Ca^{2+}$  in AZ in the  
232 AD-affected synapse (*Supplementary Fig 1C, D*).

233

234 To assess the direct correspondence between the changes in different aspects of SVR and  
235 enhanced  $Ca^{2+}$  release, we examine the cumulative  $Ca^{2+}$  at AZ. The elevated  $Ca^{2+}$  release from  
236 the ER maintains larger cumulative  $Ca^{2+}$  (area under the  $Ca^{2+}$  transient) at AZ in the AD-  
237 affected synapse consistently across a wide range of VGCCs expression, in agreement with  
238 several studies showing that ER  $Ca^{2+}$  channels can sculpt the spatiotemporal dynamics of  
239 exocytosis and consequently neuronal function (*Fig 3G*) [8, 9]. However, this continuous  
240 enhancement as a function of VGCCs expression is not consistent with the biphasic behaviour  
241 of the time to basal rate as a function of  $Pr$ . Next, we examined the residual  $Ca^{2+}$  in the AZ,  
242 obtained as the cumulative  $Ca^{2+}$  that persists during decay phase of the  $Ca^{2+}$  transient. Our  
243 results show that larger residual  $Ca^{2+}$  in AD-affected synapses also exhibits a biphasic  
244 behaviour as a function of  $Pr$  similar to the time to basal neurotransmitter release rate. Again,  
245 this enhancement was non-uniform, suggesting that small hippocampal synapses with  
246 intermediate  $Pr$  values are highly sensitive to pathological alterations (*Fig 3H*). Taken together,  
247 our data reveal that ER-driven  $Ca^{2+}$  disruption plays a critical role in shaping the observed  
248 response profile, with the acute effects induced by such disruptions more severely expressed  
249 in small hippocampal synapses. Our results also show that these effects are more sensitive to  
250 the coupling between the  $Ca^{2+}$  domains in the vicinity of VGCCs and ER in AD-affected  
251 synapses (*Supplementary Fig 1C, D*), consistent with reports on the involvement of ER  $Ca^{2+}$   
252 in the regulation of presynaptic resting  $[Ca^{2+}]_c$  and neurotransmission [7—9]. Furthermore, the  
253 sensitivity to the coupling between the  $Ca^{2+}$  domains is exacerbated for synapses with  
254 intermediate  $Pr$  values (*Supplementary Fig 1C, D*).

255

256

257

258

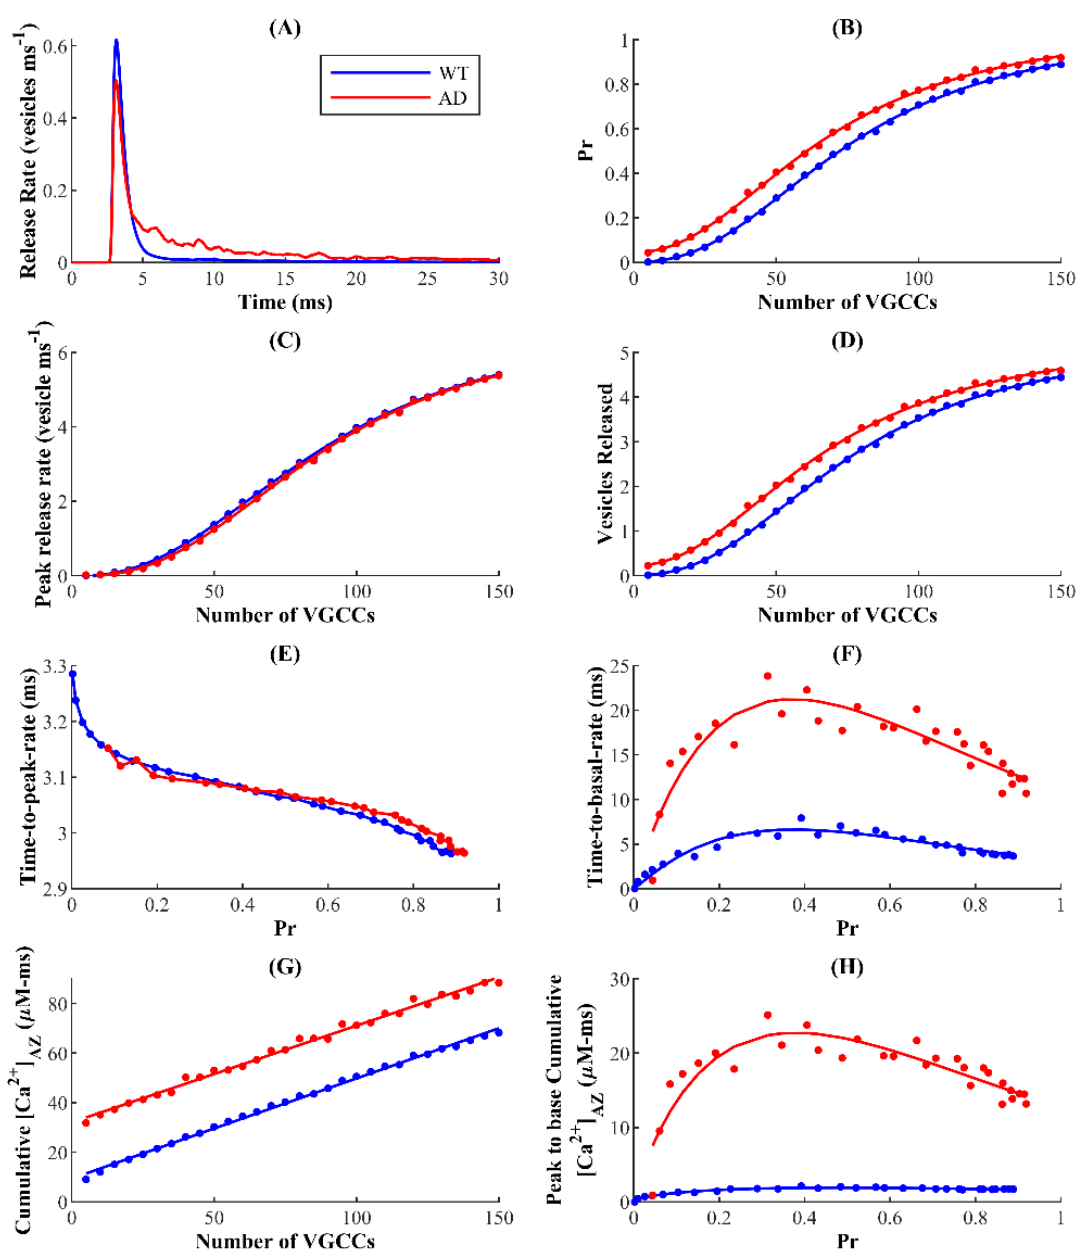

259

260 **Figure 3.** ER-driven upregulation of cytosolic Ca<sup>2+</sup> leads to enhanced synaptic vesicle release  
 261 in AD. (A) Neurotransmitter release rate in response to a single AP in WT and AD-affected  
 262 synapse. Change in the Pr of a single synaptic vesicle (B), peak release rate (C), and the average  
 263 number of vesicles released (D) as functions of the number of VGCCs. (E) Time delay of peak  
 264 release rate and (F) decay time to basal release rate as functions of Pr. (G) Change in [Ca<sup>2+</sup>]<sub>AZ</sub>  
 265 with number of VGCCs. (H) Cumulative Ca<sup>2+</sup> from peak to basal level as a function of Pr.

266

267 **Very short-term plasticity is enhanced in the AD-affected synapse**

268 Next, we investigate how the enhanced  $\text{Ca}^{2+}$  release from the ER affects very short-term  
 269 presynaptic plasticity (STP). STP is assessed by determining the paired-pulse ratio (PPR): a  
 270 classical measure of presynaptic modulation in response to paired stimuli separated by very  
 271 short time interval [23]. After stimulating the nerve terminal with two pulses separated by a 40  
 272 ms interval (*Fig 4A*), we define PPR as the ratio of the Pr following the second pulse ( $Pr_2$ ) to  
 273 that of the first pulse ( $Pr_1$ ) averaged over several trials. Therefore, the response to the second  
 274 stimulus can either be enhanced with  $Pr_2/Pr_1 > 1$  (short-term facilitation (STF)) or depressed  
 275 with  $Pr_2/Pr_1 < 1$  (short-term depression (STD)).

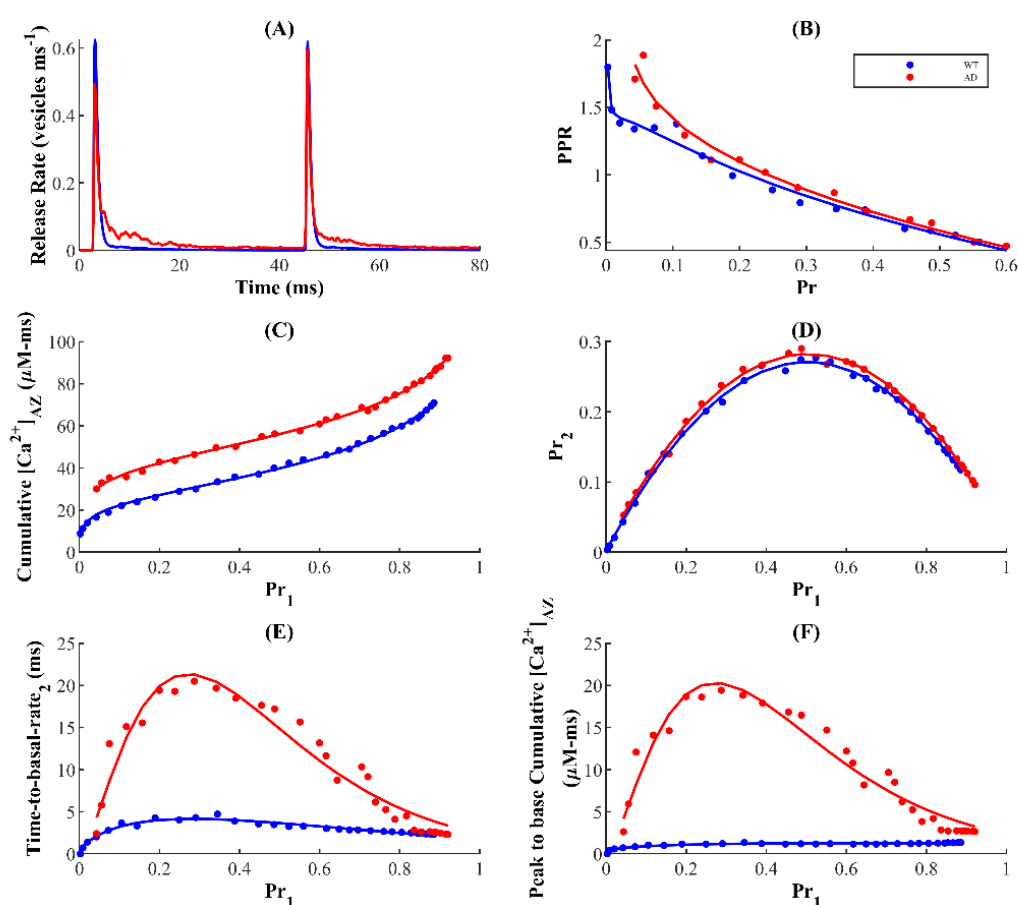

276  
 277 **Figure 4.** AD-associated  $\text{Ca}^{2+}$  upregulation enhances STF. (A) Release profile following  
 278 paired-pulse stimulation protocol. (B) PPR is inversely related to intrinsic Pr (obtained after  
 279 first pulse), and is higher in the AD-affected synapse. (C) Similar to the first pulse (Figure 3G),  
 280 cumulative  $[\text{Ca}^{2+}]_{\text{AZ}}$  after the second pulse increases with the Pr and is higher in AD-affected  
 281 synapse. (D) Pr in response to the second pulse ( $Pr_2$ ) as a function of Pr following the first

282 pulse ( $Pr_1$ ). Higher values indicate that the synapse responds more strongly to the subsequent  
283 stimulus in a paired-pulse protocol. (E) Decay time of release rate after second pulse also  
284 exhibits a biphasic behaviour. (F) Cumulative  $[Ca^{2+}]_{AZ}$  following the second pulse reflects the  
285 biphasic behaviour observed in time delay of peak-to-basal release rate in panel E.

---

286  
287 On average, both WT and AD-affected synapses exhibited an inverse relationship between  $Pr_1$   
288 and the PPR, consistent with previous findings in phasic synapses such as small glutamatergic  
289 synapses in the hippocampus (*Fig 4B*) [9, 24, 25, 30]. This negative correlation, thought to be  
290 a universal feature of these synapses, is assumed to be caused by the spike-driven depletion of  
291 vesicles in the RRP after the first pulse which is unlikely to be recovered by  $Ca^{2+}$ -driven  
292 facilitation upon the next stimulation. Therefore, whether a synapse exhibits STF or STD is  
293 largely dependent on the recent activation history, which implies that synapses with large  
294 number of VGCCs and consequently very high intrinsic release probabilities tend to depress  
295 their response more severely to a second pulse, allowing them to operate at low PPR [9, 23—  
296 26, 29, 30].

297  
298 While additional mechanisms may contribute to STD, the depletion model of depression in  
299 phasic synapses suggests that at rest, the priming sites containing the RRP of vesicles is mostly  
300 occupied and reflects the inability of residual  $Ca^{2+}$ —left over from the previous stimulation—  
301 and the incoming flux to potentiate release during the second stimulation [27, 28]. In agreement  
302 with these findings, our model establishes the dynamic equilibrium between the RRP (primed  
303 pool) and the unprimed pool by ensuring a relatively faster priming rate. As a result, we find  
304 here that most synapses operating in the intermediate-release-probability regime, characteristic  
305 of hippocampal excitatory synapses, display low STD with  $PPR < 1$  in both WT and disease  
306 states (*Fig 4B*). Strikingly, AD-affected synapse displays enhanced presynaptic strength  
307 relative to WT synapse, in contrast to the notion that the activity-dependent tunability of PPR  
308 ensures that periods of elevated activity results in subsequently depressed response. A simple  
309 explanation for this is that in the AD-affected synapse, the elevated residual  $Ca^{2+}$  in the nerve  
310 terminal after the conditioning stimulus is longer-lasting and facilitates additional release upon  
311 subsequent stimulation (*Fig 4A*). To test the veracity of this claim, we examined whether the  
312  $[Ca^{2+}]_{AZ}$  remains elevated following the second pulse. Consequently, we find that the AD-  
313 associated enhancement of residual  $[Ca^{2+}]_{AZ}$  is sustained after the second stimulation and  
314 increases with  $Pr_1$  (*Fig 4C*). These results suggest that on short timescales, the reduced

315 depression observed in AD synapses is orchestrated by  $\text{Ca}^{2+}$  released from internal stores and  
316 induces a history-dependent enhancement of STP with respect to the WT synapse.

317

318 Although our results suggest that higher-probability synapses always express greater  
319 depression, it is still unclear whether probability of transmission of consecutive spikes  
320 monotonically relates to intrinsic release probability, and what role the ER plays in sculpting  
321 the concomitant profile. For this purpose, we examine the  $Pr_2$  as a function of  $Pr_1$  (*Fig 4D*),  
322 which reflects the conditional probability that a successful release event on the first pulse is  
323 followed by another successful release on the second pulse. Our data reveal that the success of  
324 a transmission event in response to the second stimulus depends on that for the first stimulus  
325 in a bell-shaped manner, indicating that the probability of vesicle release upon consecutive  
326 spikes is attenuated at both low and high probability synapses. This implies that synapses with  
327 intermediate synaptic transmission failures display higher success of transmission of  
328 consecutive spikes, in agreement with the idea that the stochasticity/unreliability of  
329 transmission probability can enhance the efficacy of information transmission across the  
330 synapse [31—33]. Unsurprisingly, the AD-affected synapse facilitates transmission in  
331 response to the second stimulus more strongly compared to the WT synapse. This suggests that  
332 diseased synapses retain longer history of  $\text{Ca}^{2+}$  events, which consequently contributes to  
333 hyperactivation of release at short time scales. To verify this claim, we examined whether the  
334 biphasic response of the of decay time and cumulative  $[\text{Ca}^{2+}]_{\text{AZ}}$  due to the first stimulus is  
335 sustained after the second stimulus. Indeed, we observe that both decay time and cumulative  
336  $[\text{Ca}^{2+}]_{\text{AZ}}$  retain their bell-shaped dependence on  $Pr_1$  (*Fig 4E & 4F*). Importantly, the AD-  
337 affected synapse exhibits markedly enhanced response to the second stimulus following the  
338 elevated residual  $[\text{Ca}^{2+}]_{\text{AZ}}$  due to the first pulse, in agreement with the notion that AD-affected  
339 synapses can result in enhanced excitation of neuronal processes. These findings are consistent  
340 with previous work showing that, particularly in the early stages of AD, over-excitation  
341 dominates neuronal circuits with soluble  $\text{A}\beta$  oligomers and contribute to cognitive dysfunction  
342 and impairments [34—36]. In summary, AD-associated enhanced  $\text{Ca}^{2+}$  release from  
343 intracellular stores leads to a history-dependent enhanced STP and hyperactivation of neuronal  
344 processes at short time scales with respect to WT synapses. We also notice that the higher  
345 coupling strength between the AZ and microdomain of  $\text{IP}_3\text{Rs}$  cluster exacerbate the enhanced  
346 PPR but has a marginal effect on the bell-shaped behaviour of  $Pr_2$  as a function of  $Pr_1$  in AD-  
347 affected synapses (*Supplementary Fig 2*).

348

349 ***AD-associated  $Ca^{2+}$  rises differentially regulate synchronous and asynchronous release***  
350 ***during repetitive stimulation***

351 Next, we investigate the effect of upregulate cytosolic  $Ca^{2+}$  on synaptic response following  
352 trains of stimuli. As in the previous section, we stimulate the synapse with a train of 20 APs  
353 delivered at 20 Hz and defined facilitation as the ratio of response following the  $n^{th}$  stimulus  
354 ( $R_n$ ) to that of the first ( $R_1$ ) averaged over several trials. Therefore, synaptic response to  
355 successive stimuli in the pulse train can either be depressed, with  $R_n/R_1 < 1$ , or facilitated, with  
356  $R_n/R_1 > 1$ . In both WT and AD-affected synapses, repetitive activation leads to depression of  
357 both peak release rate (*Fig 5a*) and Pr (*Fig 5b*) that increase with subsequent stimuli. Here, the  
358 AD-affected synapse exhibits lower peak release rate (*Fig. 5C*) and baseline Pr (*Fig. 5D*)  
359 leading to lower facilitation that persists throughout activation. The depression due to higher-  
360 frequency longer (~450 msec) stimulus train observed in the AD-affected synapse results from  
361 rapid depletion of the vesicles in the RRP relative to the WT synapse (*Fig 5E*).

362  
363 Although evoked peak release rate and Pr exhibit similar decay as functions of pulse number,  
364 AD-associated  $Ca^{2+}$  disruptions differentially affect these two properties. While the peak  
365 release rate in case of the WT synapse remains mostly higher than that of the AD-affected  
366 synapse, the Pr in case of AD-affected synapse is consistently higher following successive  
367 stimuli (*Fig 5C & 5D*). These results indicate that during ongoing activity, ER-mediated  $Ca^{2+}$   
368 disruptions drives a competition between the primary modes of exocytosis; short-lived  
369 synchronous release that dominates evoked release during low-frequency stimulation, and  
370 slower asynchronous release which persists for several milliseconds and builds up during  
371 higher-frequency stimuli trains [1, 37]. Consistent with previous reports, we observe that  
372 during the pulse-train depression, synchronous release progressively declines, whereas  
373 asynchronous release peaks and subsequently decays with stimulus number (*Fig 5G & 5H*).  
374 These results also show that while both forms of release compete for the same pool of releasable  
375 vesicles, residual  $Ca^{2+}$ , which builds up during repetitive stimulation may allow asynchronous  
376 release access to a larger subset of the RRP initially [38, 39, 40]. Our findings here indicate  
377 that impairments such as AD pathology, which trigger elevated levels of residual intracellular  
378 [ $Ca^{2+}$ ] (*Fig 5F*), significantly enhance asynchronous release during first few pulses (*Fig 5G*).  
379 For both WT and AD-affected synapses, the decrease in asynchronous release after the peak is  
380 dictated by competition with synchronous release for the same vesicle resources, which are  
381 rapidly depleted with subsequent stimuli (*Fig 5G & 5H*) [39, 41]. Interestingly, the greater

382 degree of depression in the AD-affected synapse is positively correlated with profound increase  
383 and decrease in the rates of asynchronous and synchronous release respectively. Together, our  
384 data suggest that during the stimulus train, AD pathology elicits significantly more  
385 asynchronous release at the expense of synchronous release, consistent with the notion that  
386 elevated residual  $\text{Ca}^{2+}$  underlies asynchronous release. Since the majority of evoked exocytosis  
387 occurs synchronously with AP-triggered  $\text{Ca}^{2+}$  influx, the enhanced switch from synchronous  
388 to asynchronous release in the AD-affected synapse reflects the increased depression of  
389 synaptic transmission with repetitive stimulation. As clear from *Supplementary Fig 3*, the  
390 higher coupling between the microdomain around  $\text{IP}_3\text{Rs}$  cluster and AZ exacerbate the synaptic  
391 depression in AD-affected synapses more than WT synapses.

392



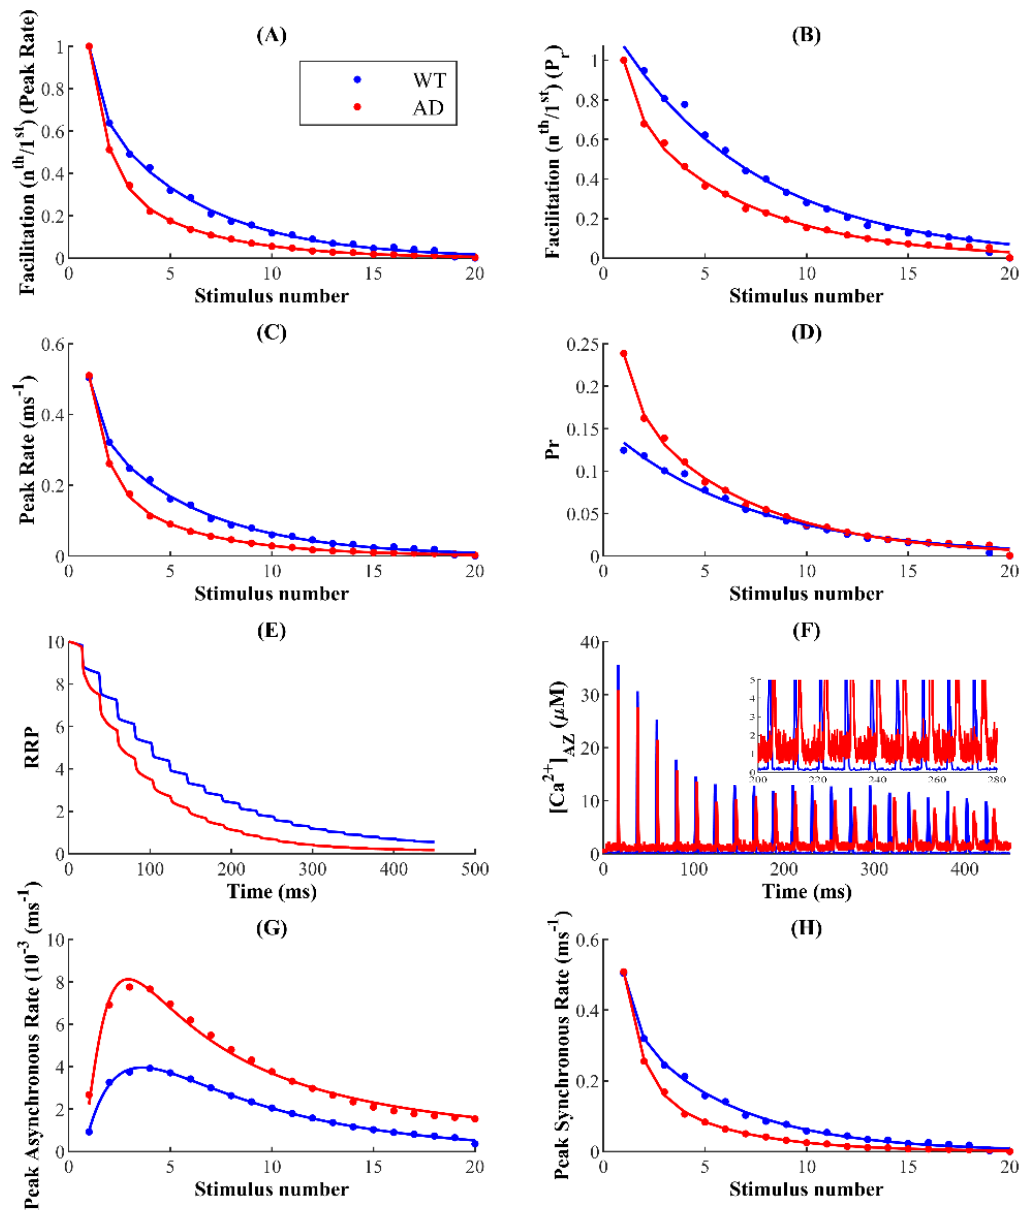

393

394 **Figure 5.** *The AD-affected synapse exhibit stronger depression in response to 20 pulse*  
 395 *stimulus-train delivered at 20 Hz. Facilitation obtained from peak rate (A) and Pr (B) shows*  
 396 *that AD pathology induces more severe depression relative to control conditions. Peak release*  
 397 *rate (C) and Pr (D) following each AP in the train. (E) Pulse train depression is primarily*  
 398 *governed by RRP depletion, which is more severe in synapses with AD pathology. (F)*  
 399 *[Ca<sup>2+</sup>]<sub>AZ</sub> (top) and zoom-in (inset) showing the differences in basal [Ca<sup>2+</sup>]<sub>AZ</sub> levels. (G)*  
 400 *Asynchronous release peaks and subsequently decays following depletion of RRP. (H) Peak*  
 401 *synchronous release mimics the response seen in the overall release.*

402

### 403 ***Synchrony of release events is reduced in the AD-affected synapses***

404 Motivated by substantial evidence supporting reduced temporal coordination of neural activity  
405 in AD-affected networks, we next examine the degree of synchronization between stimulus  
406 and response in WT and AD-affected synapses during repetitive stimulation [118—120]. Given  
407 the loose temporal coordination of neuronal response during asynchronous release, the  
408 observed shift from synchronous to asynchronous release during stimulation in AD should  
409 reduce the synchrony between the pulse and response [39]. To test this hypothesis, we measure  
410 the event synchrony between each spike in the pulse train and corresponding release using a  
411 modified Pinsky-Rinzel algorithm (see Methods for details) [121, 123]. In extreme cases, pulse  
412 and release event times can either be perfectly aligned with synchrony value of 1, reflecting  
413 pristine temporal stimulus-response coordination, or desynchronized where synchrony value  
414 of 0 reflects temporally uncorrelated activity and stimulus patterns.

415

416 The phase of individual release events in response a stimulus train reveals that synapses with  
417 AD pathology exhibit significant decrease in coherence of stimulus and release events, an  
418 observation that is seen consistently across a wide range of the Pr values (*Fig 6a & b*). In-silico  
419 studies of the effect of presynaptic  $Ca^{2+}$  stores on exocytosis at the CA3 terminal suggest that  
420 the ER allows highly stochastic hippocampal synapses with low intrinsic release probability to  
421 operate with increased reliability [9]. Unsurprisingly, in both the diseased and WT cases,  
422 synapses with low Pr exhibit relatively higher phase coherence that persists upon subsequent  
423 stimulation (*Fig 6a & b*). Thus, our findings here suggest that the alternative strategy to achieve  
424 robust firing rates—employed by synapses with high intrinsic Pr that deplete the RRP  
425 quickly—may render the synapses unreliable during repetitive stimulation.

426

427 Furthermore, a quantitative comparison of the synchrony measure reveals that AD-affected  
428 synapses with altered intracellular  $Ca^{2+}$  signalling exhibit significantly reduced temporal  
429 coordination of activity as compared to WT synapses. This suggests that in addition to other  
430 impairments discussed above, unreliability in the temporal coordination of neuronal activity is  
431 also a key hallmark of AD-affected synaptic terminals (*Fig 6c*). This conclusion is consistent  
432 with *in vivo* recordings from neocortical pyramidal neurons where amyloid- $\beta$  plaques in APP-  
433 Sw (Tg2576 transgenic mice model of AD) increased jitter in evoked AP, consequently  
434 reducing synaptic integration and information transfer [122]. Although our data so far indicate

435 that synapses with higher  $P_r$  express reduced synchronization in both WT and AD conditions,  
436 the relative sensitivity of synapses with low, intermediate, and high  $P_r$  to pathological  
437 alternations is yet to be explored. Thus, we next examine the relative change in synchrony from  
438 WT to AD condition across a wide range of  $P_r$  values (*Fig 6d*). Our results show that there is  
439 an inverted bell-shaped relationship between relative synchrony and intrinsic  $P_r$ , suggesting  
440 that the physiological (intermediate)  $P_r$  which allows small hippocampal synapses to operate  
441 with reliable firing rates also renders them more sensitive to pathological alterations. Taken  
442 together, these data suggest that the pathophysiological manifestations of impaired intracellular  
443  $Ca^{2+}$  handling include suboptimal neuronal synchronization, reducing the fidelity of  
444 information integration and transmission. In addition, the results confirm that hippocampal  
445 synapses with intermediate  $P_r$  values exhibit a more severe impairment of their otherwise finely  
446 tuned temporal rate codes when subject to AD-related alterations in  $Ca^{2+}$  signalling.

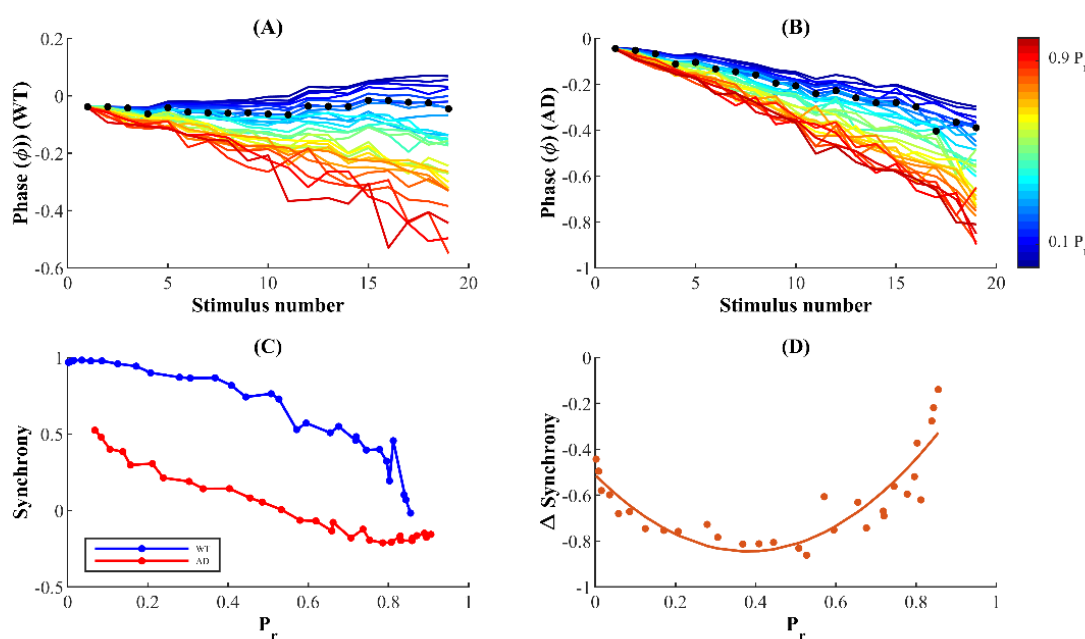

447

448 **Figure 6.** *AD-related  $Ca^{2+}$  disruptions impair spike-SVR synchrony.* The phase of individual  
449 release events with respect to AP in WT (A) and AD-affected (B) synapses over a wide range  
450 of  $P_r$  values. Black dots indicate the event phases corresponding to 35 VGCCs with initial  $P_r$   
451 during pulse train ( $P_{r1}$ ) equal to 0.14. (c) Synchrony of release event in response to the  
452 preceding pulse in WT and AD-affected synapses. (d) The magnitude of relative synchrony  
453 change from WT to AD conditions as a function of initial release probability during prolonged  
454 stimulation.

455

456

## 457 **Discussion**

458 Despite extensive experimental studies reporting the ubiquitous presence of ER in both axonal  
459 and dendritic compartments of neurons, little is known about its role in modifying major  
460 components of synaptic transmission during AD related pathologies [42–44]. In this study, we  
461 fill this gap by building a detailed biophysical model that accurately captures the  
462 compartmentalized signalling of  $\text{Ca}^{2+}$  at axonal terminals. In particular, our model incorporates  
463 ER-driven and AP-triggered presynaptic  $\text{Ca}^{2+}$  signalling as well as the resulting release  
464 mechanism in WT and AD-affected synapses. This is especially motivated by reports of distinct  
465 regulatory mechanisms for intracellular  $\text{Ca}^{2+}$ , which primarily includes a cluster of ligand-  
466 gated  $\text{IP}_3\text{R}$   $\text{Ca}^{2+}$  channels situated on the ER as well as voltage activated  $\text{Ca}^{2+}$  channels  
467 constrained to the AZ, that result in tight microdomain signalling [6, 66–69]. In hippocampal  
468 synapses, the formation of evoked transient  $\text{Ca}^{2+}$  microdomains in the AZ is predominantly  
469 mediated by the rapid kinetics of P/Q-type VGCCs which open with minimal delay upon the  
470 arrival of AP, while subcellular domains in the vicinity of the ER occurs via the stochastic  
471 gating of  $\text{IP}_3\text{Rs}$  that require  $\text{IP}_3$  and  $\text{Ca}^{2+}$  binding. In order to make meaningful quantitative  
472 predictions, we proceeded by developing a model that accurately captures the characteristic  
473  $\text{IP}_3\text{R}$ 's gating in WT and AD-affected neurons [16, 17, 128]. We next, incorporated a  
474 comprehensive description of presynaptic processes including evoked  $\text{Ca}^{2+}$  influx through  
475 VGCCs;  $\text{Ca}^{2+}$  release and uptake by the ER; and synchronous, asynchronous, and spontaneous  
476 modes of synaptic transmission. Inspired by several lines of evidence elucidating the existence  
477 of a bidirectional interaction of intracellular  $\text{Ca}^{2+}$  channels and presynaptic VGCCs mediated  
478 by stromal interaction molecules (STIM-1) and Orai channels, we have implemented a bi-  
479 directional coupling between the ER and AZ in our model that uncovers a unique biphasic  
480 dependence of decay times of release and  $\text{Ca}^{2+}$  on the baseline probability [7, 73]. Our model  
481 incorporates these critical components of presynaptic signalling and especially reproduced the  
482 observed spatiotemporal characteristics of intracellular  $\text{Ca}^{2+}$ —rise times, decay times, and  
483 amplitudes of corresponding events—and accounts for the stochasticity of presynaptic  $\text{Ca}^{2+}$   
484 dynamics driven by stochastic channel openings [6, 16, 70, 71]. Release rate, facilitation and  
485 depression varies dramatically among phasic and tonic synapses—phasic synapses are  
486 dominated by depression, whereas tonic synapses can facilitate tremendously by vesicle  
487 recruitment [27, 28]. Constrained by kinetics data of vesicular release observed in other phasic

488 cell types, our model closely reproduces essential determinants of neurotransmitter release,  
489 which consequently promoted close estimation of PPR and facilitation requirements necessary  
490 to maintain normal plasma membrane function [23, 24, 28]. Following these independent  
491 validations, it is reasonable to assume that the biophysical model and protocols developed in  
492 this work are physiologically realistic representation of neuronal processes in control and  
493 disease cases.

494

495 Broadening of  $\text{Ca}^{2+}$  waveforms and response profiles affect the reliability of synaptic  
496 information transfer at affected terminals. Our results suggest that AD-associated increase in  
497  $\text{Ca}^{2+}$  release from the ER affect nearly all aspects of SVR. Despite the high stochasticity at the  
498 hippocampal CA3 terminal, the ER allows individual synapses operating in the low- and  
499 intermediate-probability regime maintain relatively higher reliability of information-rate  
500 coding [9]. Here, our results show that the AD-associated enhanced  $\text{Ca}^{2+}$  selectively diminishes  
501 the reliability of intermediate-Pr synapses, suggesting that low- and intermediate Pr synapses  
502 are more susceptible to AD-associated  $\text{Ca}^{2+}$  disruptions. Importantly, the model predicts that  
503 aberrant  $\text{Ca}^{2+}$  rise in AD-affected neurons may trigger hyperactivity over very short timescales  
504 (~30-60 msec) and lowers facilitation during prolonged (~450 msec) stimulation. We also  
505 report enhanced excitability in pathological synapses when simulated with higher coupling,  
506 which corresponds to a tighter feedback loop between the ER and AZ. Thus, our findings here  
507 provide a plausible explanation for why alterations in ER  $\text{Ca}^{2+}$  handling, which result in  
508 excessive efflux, induce a severe perturbation of neuronal processes that can in turn decrease  
509 the reliability of information encoded in the firing rate of neurons affected by AD pathology  
510 [9, 72]. Overall, our findings provide novel insights into the role of aberrant ER  $\text{Ca}^{2+}$  release  
511 in altering the release profile of a synapse in AD and other neurodegenerative diseases where  
512 such  $\text{Ca}^{2+}$  impairments are observed [136].

513

514 Many explorations into the  $\text{Ca}^{2+}$ -dependence of release have proposed that periodic  $\text{Ca}^{2+}$   
515 release from the ER, which occurs predominantly via the rapid gating kinetics of  $\text{IP}_3\text{R}$ , could  
516 trigger a series of physiological events—such as activating  $\text{Ca}^{2+}$ -sensing G proteins—that  
517 eventually manifest as changes in the global  $[\text{Ca}^{2+}]$  and, in turn, influence spontaneous release:  
518 a miniature form of exocytosis [21, 47]. Although  $\text{IP}_3\text{Rs}$  are differentially expressed according  
519 to cell type, several studies report the functional involvement of  $\text{IP}_3\text{Rs}$  in sculpting long-term  
520 potentiation (LTP) or depression (LTD) profiles in the CA1 region of the hippocampus [48,  
521 50]. In particular, immunocytochemical evidence reveals the expression of  $\text{IP}_3\text{Rs}$  in presynaptic

522 terminals of the rat CA3-CA1 hippocampal synapses and elucidates their modulatory role in  
523 presynaptic neurotransmitter release and synaptic plasticity [49]. Shorter opening times and  
524 longer closing times are characteristic features of the gating kinetics of IP<sub>3</sub>R<sub>s</sub> in cortical  
525 neurons and are essential for the homeostasis of local and global Ca<sup>2+</sup> in the norm. Consistent  
526 with these requirements, studies on AD patients have implicated exaggerated Ca<sup>2+</sup> release  
527 mediated by altered IP<sub>3</sub>R activity to dysregulation of bulk Ca<sup>2+</sup> which consequently triggers  
528 progressive loss of synaptic function [51—54]. From our model it is clear that these intrinsic  
529 biophysical properties of IP<sub>3</sub>R make it highly effective at maintaining physiological bulk Ca<sup>2+</sup>  
530 and *Pr*, whereas upregulated IP<sub>3</sub>R orchestrates exaggerated Ca<sup>2+</sup> from the ER and in turn  
531 increases the *Pr*.

532

533 Consistent with experimental evidence, our model reproduces the well-established inverse  
534 relationship between the *Pr* and PPR but suggests that the enhanced STP over rapid timescales  
535 observed in AD merely indicates hyperactivity rather than increased synaptic reliability [23,  
536 59]. The most crucial insight from this finding is that pathological synapses retain a longer  
537 history of Ca<sup>2+</sup> dynamics, which consequently causes them to exhibit enhanced excitation in a  
538 paired-pulse protocol. The traditional view claiming the massive reduction in the efficacy of  
539 excitatory synaptic transmission in early stages of AD has been challenged recently by several  
540 studies reporting aberrant Ca<sup>2+</sup> homeostasis and hyperactivity in AD-affected neuronal  
541 networks [10, 36, 34]. A key finding of these studies is that hyperactivity is an early dysfunction  
542 in hippocampal synapses, whereas neuronal silencing emerges during later stages of the  
543 disease. Our model predicts that synaptic facilitation and depression depend on the timescale  
544 and frequency of stimulation. Relatively short low-frequency stimuli cause facilitation, which  
545 supports the idea that by enhancing potentiating over rapid time scales, aberrant Ca<sup>2+</sup> release  
546 from intracellular stores plays an important role in the history-dependent neuronal  
547 hyperactivity observed during early states of AD.

548

549 Our model shows that long high-frequency pulses trigger depression in AD-affected synapses,  
550 which is governed by depletion of RRP of vesicles. Experimental evidence reports three  
551 distinct molecular pathways for exocytosis [37]. Indeed, synchronous, asynchronous, and  
552 spontaneous modes of vesicular release, characterized by distinct release timescales, have been  
553 reported in cultured hippocampal synaptic terminals [21, 38]. Synaptotagmin-1 (Syt1) and 7  
554 (Syt7) are the Ca<sup>2+</sup> sensors controlling the timescales of synchronous and asynchronous release  
555 in CA3 pyramidal neurons respectively [37, 60]. The rapid kinetics and low Ca<sup>2+</sup> affinity of

556 Syt1 satisfies the remarkable temporal precision of synchronous release, where most vesicles  
557 immediately fuse with the membrane following stimulation. On the other hand, the slow  
558 kinetics of Syt7 promotes progressive desynchronization of release later in the spike train [61].  
559 Studies on Syt1 knockout mice reported selective abolishment of synchronous release and  
560 increase in the magnitude of asynchronous release. Likewise, knockdown of Syt7 enhanced  
561 synchronous release in zebrafish's neuromuscular junction, suggesting that the primary modes  
562 of exocytosis draw from the same vesicle resources in the RRP, which causes their activity  
563 patterns to be negatively correlated [38, 61—65]. The most critical insight of these findings is  
564 that manipulations that suppress synchronous release increases the vesicle resources available  
565 for asynchronous release and indirectly enhance its magnitude. In agreement with the above,  
566 during ongoing activity, we observed a shift from synchronous to asynchronous exocytosis  
567 leading to increased depression of synaptic transmission during AD pathology.

568

569 CA3-CA1 presynaptic terminals are equipped with a conspicuously low release probability that  
570 allows them to maintain a delicate balance between facilitation and reliability, giving rise to  
571 finely tuned rate codes with remarkable temporal precision. Thus, perturbations of release  
572 mechanisms are expected to alter the fidelity of neural rhythms in AD. Indeed, cortical neurons  
573 with A $\beta$  peptide expressed reduced N-methyl D-aspartate (NMDA) receptor density, resulting  
574 in rapid and persistent depression of NMDA-evoked currents [120]. Moreover, the severe  
575 impairment of evoked synaptic response latency observed in Tg2576 mice overexpressing APP  
576 provides direct evidence for reduced temporal coincidence of response in AD [122]. These  
577 findings suggest that impaired response precision is an acute effect of perturbations due to AD  
578 that leads to overt cortical deficits. In agreement with these observations, our results reveal  
579 increased latency of release events in AD and uncover unique dependence of synchrony  
580 change—from control to AD—on intrinsic Pr. The loss in temporal coordination of release in  
581 AD is more severely expressed at a physiologically plausible Pr range for hippocampal  
582 synapses, although lower-Pr synapses exhibit relatively elevated temporal precision in both  
583 WT and AD-affected synapses. Thus, despite the high fidelity of hippocampal synapses, their  
584 conspicuously low response success may make them more susceptible to AD pathology. We  
585 hope that future experiments will uncover the molecular mechanisms underlying the  
586 pathological enhancement of susceptibility in low-Pr hippocampal synapses.

587

588 We remark that while our model is developed to be consistent with most observations in the  
589 hippocampal CA3-CA1 synapses, it does not incorporate the uneven distribution of P/Q-type,

590 N-type and R-type VGCCs specifically found in the AZ of central synapses [74, 75]. At  
591 hippocampal glutamatergic synapses, Cav2.1—P/Q-type—channels are thought to be most  
592 enriched at the presynaptic AZ and predominantly govern  $\text{Ca}^{2+}$  influx at the axon terminal [78].  
593 Thus, like others, we value parsimony and use a formulation with only P/Q VGCCs [70].  
594 Furthermore, results from cultured hippocampal and superior cervical ganglion neurons  
595 provide evidence for direct interactions between the release machinery and VGCCs, implying  
596 that channel distribution is important for accurately predicting the spatiotemporal profiles of  
597 evoked release [76, 77]. Our model does not capture the effect of spatial distribution of VGCCs  
598 on synaptic transmission, neither does it incorporate other mechanisms for paired-pulse  
599 modulation expressed at putative single hippocampal synapses—lateral inhibition and release  
600 inactivation [23, 24]. Thus, despite reproducing the observed inverse relationship between  
601 paired-pulse facilitation and initial Pr, our model falls short of the measured values, suggesting  
602 that we cannot eliminate additional mechanisms when investigating the interplay between  
603 residual  $\text{Ca}^{2+}$ , facilitation, and depression. Although  $\text{IP}_3\text{R}$ -dependent modulation of cytosolic  
604  $\text{Ca}^{2+}$  is usually adequate for explaining the critical aspects of ER  $\text{Ca}^{2+}$  release and regulation  
605 of neurotransmission, the upregulation of RyR expression and modulation of  $\text{IP}_3\text{Rs}$ ' gating due  
606 to  $\text{Ca}^{2+}$  release through RyRs (and vice versa) are also thought to play a key role in the aberrant  
607  $\text{Ca}^{2+}$  release from the ER, as well as propagation of presynaptic signals [16, 17, 79, 94—100,  
608 127—129]. It has been suggested that at the hippocampal Schaffer-collateral pathway,  
609 presynaptic presenilin inactivation perturbs STP and facilitation via impaired RyR function  
610 [80, 81]. Furthermore, in 3xTg-AD mice, deviant RyR activity triggers  $\text{Ca}^{2+}$  signalling  
611 alterations that promote synaptic depression [82]. However, our model does not describe the  
612 contribution of presynaptic RyRs to vesicular release, as the biophysical properties of these  
613 receptors yield a distinct temporal range of  $\text{Ca}^{2+}$  transients that can modulate LTP/LTD [83,  
614 84]. Another key factor missing from our model is synaptic mitochondria. Mitochondria play  
615 a key role in shaping  $\text{Ca}^{2+}$  gradients in synaptic terminals. Synaptic mitochondria are among  
616 the earliest targets in AD. Among other things, the ATP production and  $\text{Ca}^{2+}$  buffering  
617 capacities of mitochondria are severely disrupted [140, 141]. All these issues are the subjects  
618 of our future research.

619

620 In summary, we have leveraged diverse experimental data to model  $\text{Ca}^{2+}$  homeostasis in axonal  
621 terminal and how exocytosis is affected in AD. Motivated by the difficulty in probing signalling  
622 cascades at the AZ of small hippocampal synapses, our main goal was to build a comprehensive  
623 but simple framework for unravelling the role of enhanced  $\text{Ca}^{2+}$  release from the ER in SVR



624 during AD pathology. In addition to agreeing closely with several observations about the  
625 kinetics of IP<sub>3</sub>Rs, SVR, and synaptic plasticity in both WT and diseased synapses, our  
626 modelling work provides key insights into impaired presynaptic function in AD. Specifically,  
627 we make five key predictions: (1) the overall Pr in response to a single AP is upregulated in  
628 AD-affected synapses, (2) short-lived low-frequency stimuli promotes potentiation in AD-  
629 affected synapses, (3) during sustained high-frequency stimulation, AD-affected terminals  
630 exhibit enhanced depression, (4) AD-affected synapses operate less reliably, and (5) the effect  
631 of AD pathology is exacerbated in synapses with low to intermediate Pr. Taken together with  
632 the aforementioned limitations, our analysis highlights the need for further studies on  
633 investigating the role of perturbed Ca<sup>2+</sup> signalling due to intracellular organelles such as the ER  
634 and mitochondria in cognitive deficits associated with AD and other neurodegenerative  
635 diseases.

636

## 637 **Materials and Methods**

### 638 *Calcium model*

639 Building on extensive literature, we capture intracellular Ca<sup>2+</sup> dynamics by first developing a  
640 compartmental model of a hippocampal CA3 axonal bouton, which includes main fluxes that  
641 invade the bulk cytosol as well as regulatory mechanisms present in the ER [67, 109—111]  
642 (*Fig. 7*). Our canonical synaptic bouton is modelled as a sphere with fixed volume  $V_{bouton} =$   
643  $0.122 \mu\text{m}^3$ , in agreement with findings from ultrastructural analysis of hippocampal synapses  
644 [2, 78]. We consider an average of 1.3 AZs in small hippocampal boutons implemented in a  
645 spherical AZ (with area =  $0.04 \mu\text{m}^2$ ) [2, 78]. Although we assume a well-mixed cytoplasm, we  
646 next incorporate two microdomains of sharp Ca<sup>2+</sup> transients produced by clusters of IP<sub>3</sub>R and  
647 VGCCs proximal to the ER and plasma membrane respectively. Because the VGCCs (P/Q-  
648 type Cav2.1 channels) implemented here are spatially distributed in small clusters within the  
649 AZ, we implemented a characteristic 25 nm cluster [6, 78]. To account for the spatial extent of  
650 the Ca<sup>2+</sup> domain in the vicinity of the VGCCs cluster, we use the findings in cortical pyramidal  
651 terminals that show that low mM concentrations of the slow Ca<sup>2+</sup> buffer ethylene glycol  
652 tetraacetic acid potently attenuates transmitter release [46, 115, 116] for guidance. We consider  
653 a cytosol-to-VGCCs microdomain ratio of 60, assuming a domain of elevated [Ca<sup>2+</sup>] that  
654 extends over more than 100 nm [46, 66]. As a result of these considerations, the Ca<sup>2+</sup> dynamics

655 in the respective compartments as well as the entire bouton ( $[Ca_{total}^{2+}]$ ) is described by four  
 656 couple non-linear ODEs (*Eqs. 1-4*). *Tables 1* defines the fluxes ( $J$ ) in terms of various  $Ca^{2+}$   
 657 concentrations, along with volume fractions. The parameters used are listed in *Tables 2* and *3*.  
 658 As a critical second messenger, the pathways for  $IP_3$  metabolism are succinctly described in  
 659 *Eq. 5* [112, 114], with further details in *Table 4*. Inhomogeneity of ligands persists throughout  
 660 the bouton; however, we assume spatially homogenous compartments, and only track temporal  
 661 evolution of ligands.

$$662 \quad \frac{d}{dt} [Ca_{cyt}^{2+}] = J_{in} + J_{IPR-diff} - J_{PMCA} + J_{ER-leak} + J_{VGCC-diff} - J_{SERCA}, \quad (1)$$

$$663 \quad \frac{d}{dt} [Ca_{IPR_n}^{2+}] = \delta_1 (J_{IPR} - J_{IPR-diff}) + J_{coupling}, \quad (2)$$

$$664 \quad \frac{d}{dt} [Ca_{AZ}^{2+}] = \delta_3 (J_{VGCC} - J_{VGCC-diff}) - \frac{1}{\delta_1} J_{coupling}, \quad (3)$$

$$665 \quad \frac{d}{dt} [Ca_{total}^{2+}] = J_{in} - J_{PMCA} + J_{VGCC}, \quad (4)$$

$$666 \quad \frac{d}{dt} [IP_3] = \frac{1}{\tau_{IP_3}} (J_{PLC} - J_{deg}), \quad (5)$$

667 where  $[Ca_{cyt}^{2+}]$  is the  $Ca^{2+}$  concentration in the cytosol,  $[Ca_{IPR_n}^{2+}]$  is the  $Ca^{2+}$  concentration in  
 668 the microdomain surrounding the  $IP_3$ Rs, and  $[Ca_{AZ}^{2+}]$  represents the  $Ca^{2+}$  concentration  
 669 surrounding the small cluster of VGCCs in the AZ.

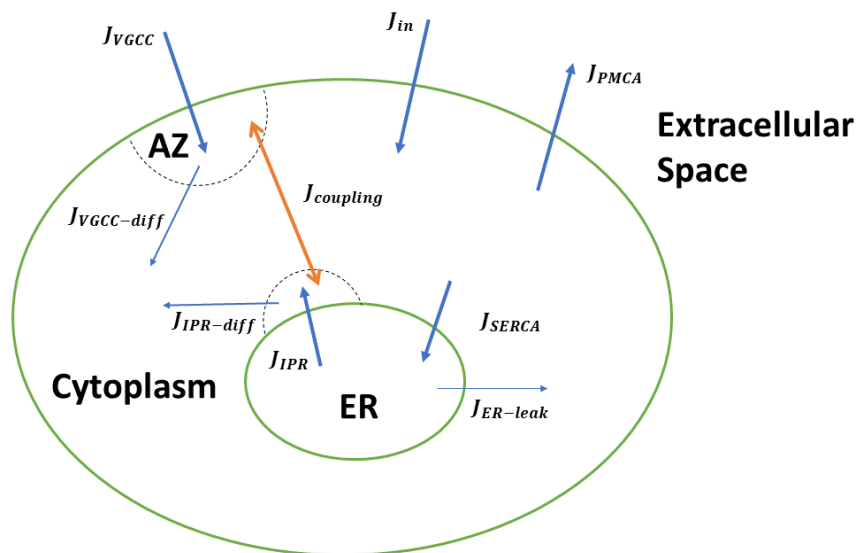

670

671 **Figure 7.** Schematic of the overall multi-compartmental  $Ca^{2+}$  model. The arrowheads show the  
 672 direction of the fluxes involved and the dotted half circles signify the  $Ca^{2+}$  domains around the  
 673 IP<sub>3</sub>Rs and VGCCS clusters.

674

675 The  $Ca^{2+}$  concentration in the ER is given by  $[Ca_{ER}^{2+}] = \delta_2(Ca_{total}^{2+} - Ca_{cyt}^{2+} + Ca_{IP_3R_n}^{2+}/\delta_1 -$   
 676  $Ca_{AZ}^{2+})$ .  $\delta_1$ ,  $\delta_2$ , and  $\delta_3$  represent the volume ratios of the intracellular compartments and are  
 677 explained in *Table 4*. Fluxes in our model were selected to account for the essential regulating  
 678 components of intracellular  $Ca^{2+}$  signalling.  $J_{in}$  represents the  $Ca^{2+}$  entry through plasma  
 679 membrane channels such as store operated  $Ca^{2+}$  channels (SOCC) and basal plasma membrane  
 680 leak.  $J_{IPR}$  represents release from the ER through IP<sub>3</sub>Rs, whereas  $Ca^{2+}$  diffusion from the  
 681 microdomain around IP<sub>3</sub>Rs cluster to the bulk cytosol is modelled by  $J_{IPR-diff}$ . Likewise,  
 682  $J_{VGCC-diff}$  and  $J_{VGCC}$  are included to account for  $Ca^{2+}$  diffusion from the AZ to the bulk  
 683 cytoplasm and influx through VGCCs respectively.  $Ca^{2+}$  efflux from the intracellular  
 684 compartment by plasma membrane  $Ca^{2+}$  ATPase (PMCA) is captured by  $J_{PMCA}$ , and  $J_{ER-leak}$   
 685 is the  $Ca^{2+}$  leak from the ER. Sequestering of  $Ca^{2+}$  from the cytoplasm into the ER through  
 686 Sarco/Endoplasmic Reticulum  $Ca^{2+}$  ATPase (SERCA) is represented by  $J_{SERCA}$ .

687

688 To investigate the effect of altered ER  $Ca^{2+}$  handling on vesicular fusion situated in the AZ, we  
 689 incorporate a flux ( $J_{coupling}$ ) intended to mimic the close association of the ER with the nerve  
 690 terminal of CA3 pyramidal neurons [101—103]. Based on evidence of the existence of a  
 691 feedback loop between synaptic function and ER  $Ca^{2+}$  content, we build a bidirectional model  
 692 of  $Ca^{2+}$  exchange. We assume a simple transfer of  $Ca^{2+}$  between the two microdomains,  
 693 potentially mediated by  $Ca^{2+}$  buffering and enzymatic proteins. This coupling is modelled by  
 694 an equation analogous to bidirectional models of SERCA flux (*Eq. 6*) [111], which where  $V_c$  is  
 695 the maximum flux from the AZ to the microdomain around IP<sub>3</sub>R cluster and  $K_c$  determines the  
 696 half-maximal transfer rate.

$$697 \quad J_{coupling} = V_c \frac{([Ca_{AZ}^{2+}]^2 - \bar{k}([Ca_{IP_3R_n}^{2+}]^2))}{[Ca_{AZ}^{2+}]^2 - K_c^2} \quad (6)$$

698 There is strong evidence that the expression of  $Ca^{2+}$  buffering proteins in AD affected neurons  
 699 is significantly lower than WT neurons [133—135]. We incorporate these observations in our  
 700 model by using parameter values that results in a stronger coupling in AD-affected bouton as

701 compared to WT bouton. Although the choice of the model has its limitations, using a model  
702 that captures buffered  $\text{Ca}^{2+}$  diffusion becomes numerically intractable quickly as distances  
703 approach physiologically reasonable order of nanometres. Thus, this approach provides an  
704 extremely useful method to account for the interplay of  $[\text{Ca}_{AZ}^{2+}]$  and  $[\text{Ca}_{IPR_n}^{2+}]$ .

705

### 706 *IP<sub>3</sub>R model*

707 In the past, several models for IP<sub>3</sub>Rs have been developed in WT and AD-affected cells [16,  
708 137—139]. All these models are based on data obtained from non-neuronal cells. While these  
709 models can be used to make reliable qualitative predictions, our goal here is to quantify the  
710 effect of upregulated  $\text{Ca}^{2+}$  signalling on neurotransmitter release where a small difference in  
711 the open probability of the channel or dwell times can result in a significant change due to the  
712 small volume of the synaptic terminal. Thus, we developed a new four-state model to  
713 implement the kinetics of IP<sub>3</sub>Rs (*Fig. 8A*). The channel has zero, two, two, and five  $\text{Ca}^{2+}$  bound  
714 when in the Resting (R), Active (A), Open (O), and Inactive (I) states, respectively. The  
715 transition rates between different states and the corresponding parameters are reported in  
716 *Tables 5 and 6* respectively. As shown in *Fig. 1*, the model closely fits the kinetics of IP<sub>3</sub>R in  
717 neurons from WT and 3xTg AD mice observed in [127]. In the cluster, the gating of each IP<sub>3</sub>R  
718 is regulated by the  $\text{Ca}^{2+}$  concentration in the microdomain around the cluster.

719

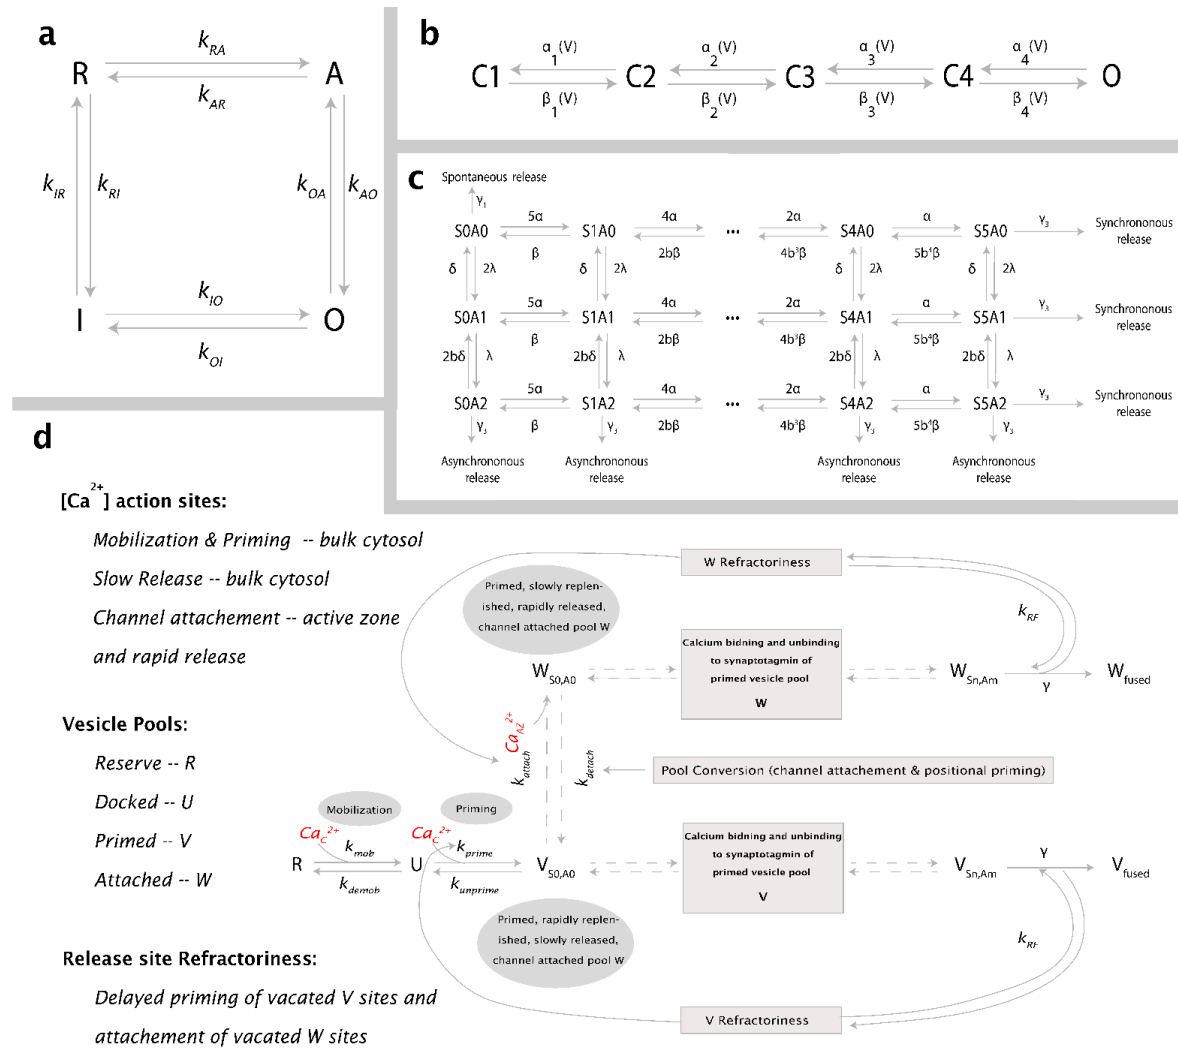

720

721 **Figure 8.** Kinetic schemes used in the model. (A) Gating kinetics of IP<sub>3</sub>R. Four-state model

722 representing the possible states along with corresponding transition rates. (B) Model for VGCC

723 gating with four closed states (C1 - C4) and one open Ca<sup>2+</sup> conducting state (O). (C) Scheme

724 for Ca<sup>2+</sup> binding to Synaptotagmin with dual Ca<sup>2+</sup> sensors for fast synchronous (S with five

725 Ca<sup>2+</sup>-binding sites), slow asynchronous (A with two Ca<sup>2+</sup>-binding sites), and spontaneous

726 exocytosis. (D) Modified from [27], the overall release scheme which includes vesicle

727 mobilization from a reserve pool (R) to docked, unprimed pool (U), molecular priming to

728 vesicles unattached to a Ca<sup>2+</sup> channel (V), and conversion to vesicles coupled to a VGCCs

729 cluster (W). Both vesicle pools are released through the dual sensor release model. Channel

730 attached vesicles are steeply dependent on [Ca<sup>2+</sup>]<sub>AZ</sub>, whereas [Ca<sup>2+</sup>]<sub>cyt</sub> governs the release of

731 detached vesicles. Reaction rates along with respective references are listed in Tables 6, 8, and

732 9.

733

## 734 **Membrane voltage dynamics**

735 The basic equations for the membrane potential used in our model are adopted from Ref. [125].  
736 Membrane potential ( $V$ ) is governed by primary  $\text{Na}^+$  ( $I_{Na}$ ),  $\text{K}^+$  ( $I_K$ ),  $\text{Cl}^-$  ( $I_{Cl}$ ), and  $\text{Ca}^{2+}$  ( $I_{Ca}$ ),  
737 currents, as well as current due applied stimulation ( $I_{app}$ ), and is given as,

$$738 \quad C_m \frac{dV}{dt} = I_{app} + I_{Na} + I_K + I_{Cl} + \left( \frac{I_{Ca}}{\text{Area}} \right),$$

739 where we assumed standard membrane capacitance  $C_m$  of  $1\mu\text{F}/\text{cm}^2$ . The  $\text{Na}^+$  and  $\text{K}^+$   
740 concentrations were assumed to be fixed, with corresponding currents consisting of active and  
741 passive leak components given by

$$742 \quad I_{Na} = -(g_{Na} m_{\infty}^3 h)(V - E_{Na}) - g_{Na_{leak}}(V - E_{Na}),$$

$$743 \quad I_K = -\left( g_K n^4 + \frac{g_{AHP}[Ca^{2+}]_{cyt}}{1+[Ca^{2+}]_{cyt}} \right)(V - E_K) - g_{K_{leak}}(V - E_K).$$

744 Chloride currents only consist of passive leak contribution, defined by  $I_{Cl} = -g_{Cl_{leak}}(V -$   
745  $E_{Cl})$ .

746 The steady state gating activation and inactivation variables, as well as associated channel  
747 forward and reverse rates were calculated using the equations in *Table 7*. Various parameters  
748 used in the membrane potential equations are listed in *Table 8*.

749

## 750 **Voltage gated $\text{Ca}^{2+}$ channels**

751 Consistent with findings in [75], we implement only the predominant high-threshold Cav2.1  
752 (P/Q-type) channels present at presynaptic nerve terminals using a five-state kinetic scheme  
753 (see *Fig. 7B*). Voltage-dependent activation and deactivation rates for each closed state ( $i = 1,$   
754  $2, 3, 4$ ) were respectively calculated as follows:  $\alpha_i(V) = \alpha_{i0} \exp(V/k_i)$ ,  $\beta_i(V) =$   
755  $\beta_{i0} \exp(V/k_i)$ , where values for activation and deactivation rates at 0 mV,  $\alpha_{i0}$  and  $\beta_{i0}$ , and for  
756 slope factor  $k_i$  were taken from [75] and listed in *Table 8*. As with the IP<sub>3</sub>Rs, we model VGCC  
757 gating stochastically as a discrete-time Markov Chain (DTMC) (see “*Numerical Methods*”  
758 section below). Single channel  $\text{Ca}^{2+}$  currents were calculated using  $I_s = gP_o(V - E_{Ca^{2+}})$ ,  
759 where values for conductance  $g$ , extracellular  $\text{Ca}^{2+}$  concentration and Nernst potential  $E_{Ca^{2+}}$   
760 were obtained from [6] and are reported in *Table 8*.

761

## 762 ***Overall release model***

763 The complete release scheme has been adopted and modified from [27] (see *Fig. 7C & 7D*). In  
764 addition to the  $\text{Ca}^{2+}$ —dependent vesicle mobilization and priming steps, we replace the  
765 independence of  $\text{Ca}^{2+}$  binding to C2A and C2B domains of synaptotagmin with the dual sensor  
766 model proposed in [1], where two independent  $\text{Ca}^{2+}$  sensors act in parallel to trigger distinct  
767 pathways of exocytosis that lead to fast synchronous, slow asynchronous, and spontaneous  
768 release. Synchronous release is mediated by the sensor  $S$  with 5  $\text{Ca}^{2+}$ -binding sites and  
769 cooperativity( $b$ ) incorporated to progressively decrease backward rates—  $\text{Ca}^{2+}$  unbinding.  
770 Synchronous fusion occurs when all 5 binding sites are occupied. Likewise, the sensor  $A$ —  
771 with 2  $\text{Ca}^{2+}$ -binding sites—mediates asynchronous release with the same cooperativity  
772 parameter  $b$ . Spontaneous release is also included and occurs at a much slower rate when the  
773 sensors have no  $\text{Ca}^{2+}$  bound. As in [70], release rates and model parameters were obtained  
774 according to fits to experimental data reported in [113]. Contrary to the dual sensor model of  
775 [1], we do not assume the synchronous ( $\gamma_2$ ) and asynchronous ( $\gamma_3$ ) release rates to be the same.  
776 This is because according to [70], hippocampal release rates from [113] could not be fitted  
777 otherwise. Consequently, we use the release rate for the asynchronous release to be  $a\gamma$  where  
778  $a = 0.025$ .

779

780 As described in [1] and shown in *Fig. 2*, compared to the Allosteric model, this model captures  
781 the expected heterogeneity and latency of exocytosis more accurately at the Calyx of Held.  
782 Apart from the intrinsic heterogeneity of release pathways, the model implemented here  
783 captures the heterogeneity of vesicle pools—slow and fast—, where docking and priming are  
784 part of the upstream processes for recruiting vesicles into the Slow-Releasing Pool (SRP) and  
785 super-priming of vesicles in the SRP aids the conversion of SRP vesicles to those in the Fast-  
786 Releasing Pool (FRP). The recruitment of vesicles into the SRP is dependent on the cytosolic  
787  $[\text{Ca}_{\text{cyt}}^{2+}]$ , whereas channel attachment is aided by  $\text{Ca}^{2+}$  influx. As described in *Fig 7*, the target  
788 of  $\text{Ca}^{2+}$  mediating vesicle fusion depends on which pool the fusing vesicle belongs to; for  
789 vesicles in the FRP, this is  $[\text{Ca}_{\text{AZ}}^{2+}]$ , while those in the SRP bind  $[\text{Ca}_{\text{cyt}}^{2+}]$ .

790

791 We also include release site refractoriness introduced in [27, 70] in order to simulate  
792 experimental observations. In this context, a vesicle cannot be released from a vacated site for

793 a period determined by  $k_{RF}$ , such that sites—either  $\text{Ca}^{2+}$ -attached ( $W$ ) or detached ( $V$ )—from  
794 which vesicles had been released remain unable to accept a new primed vesicle for some time.  
795 Phasic synapses are known to have briefer refractoriness compared to their tonic counterparts,  
796 and as such, we choose  $k_{RF}$  to be  $0.01 \text{ ms}^{-1}$ , similar to values observed at hippocampal synapses  
797 in [23]. Different parameters used in the release model are listed in *Table 9*.

798

### 799 ***Synchrony measure***

800 For a wide range of synaptic configurations with distinct intrinsic release probabilities, we  
801 computed the synchrony of AP arrival times (estimated at peak) and release event times using  
802 a modified version of the Pinsky-Rinzel measure of synchrony [121]. We transformed the  
803 firing times  $T(k)$  for every  $k^{\text{th}}$  event of the neuron into a set of corresponding vector phases  
804  $\phi(k)$  using *Eq. 7*, where  $T_{AP}(k)$  corresponds to all the AP events within the duration of  
805 simulation. For each vector phase  $\phi(k)$ , we compute the synchrony  $r(\phi(k))$ —numbers  
806 between 0 and 1—using the complex order parameter defined by Strogatz and Mirollo averaged  
807 across all events for a single synaptic configuration [123] (*Eq. 8*).

808

$$809 \quad \phi(k) = \frac{T_{AP}(k) - T(k)}{T(k+1) - T(k)} \quad (7)$$

$$810 \quad r(\phi(k)) = \frac{1}{N_K} \sum e^{(2\pi i \phi(k))} \quad (8)$$

811

### 812 ***Numerical Methods***

813 Deterministic equations (*Eqs. 1-4*) are solved using the fourth-order Runge-Kutta algorithm  
814 (RK4) with a  $1 \mu\text{s}$  time step, while the stochastic states of the  $\text{IP}_3\text{Rs}$  and VGCCs are determined  
815 by the corresponding kinetic schemes were simulated using a procedure outline in [117], which  
816 is equivalent to Gillespie algorithm with fixed time step. All numerical simulations were  
817 performed in MATLAB (The MathWorks, Natick, MA) and data analysis was carried out using  
818 custom Python scripts (version 3.9).

### 819 ***Code availability***

820 The complete model code as well as analysis scripts will be posted on our lab's webpage after  
821 the manuscript is accepted for publication.

822





824 **Tables**

825 **Table 1.** Ca<sup>2+</sup> fluxes in the model.

| Flux (reference)                                                   | Equation                                                                                                                                                                                                                                                     |
|--------------------------------------------------------------------|--------------------------------------------------------------------------------------------------------------------------------------------------------------------------------------------------------------------------------------------------------------|
| Basal leak and R/SOCC [110, 111]                                   | $J_{in} = J_{leakin} + V_{leakin}IP_3$                                                                                                                                                                                                                       |
| Ca <sup>2+</sup> diffusion from the IP <sub>3</sub> R cluster [67] | $J_{IPR-diff} = k_{IPR-diff}(Ca_{IPRn}^{2+} - Ca_{cyt}^{2+})$                                                                                                                                                                                                |
| PMCA [67]                                                          | $J_{PMCA} = V_{PMCA} \frac{(Ca_{cyt}^{2+})^n}{(Ca_{cyt}^{2+})^n + K_{PMCA}^n}$                                                                                                                                                                               |
| SERCA [67]                                                         | $J_{SERCA} = V_{SERCA} \frac{(Ca_{cyt}^{2+})^n}{(Ca_{cyt}^{2+})^n + K_{SERCA}^n}$                                                                                                                                                                            |
| ER-leak [67]                                                       | $J_{ER-leak} = k_{ER-leak}(Ca_{ER}^{2+} - Ca_{cyt}^{2+})$                                                                                                                                                                                                    |
| IP <sub>3</sub> Receptor [67]                                      | $J_{IPR} = k_{IPR}P_o(Ca_{ER}^{2+} - Ca_{IPRn}^{2+})$<br>$P_o = N_{open}/N_{IP_3R}$                                                                                                                                                                          |
| Ca <sup>2+</sup> diffusion from the VGCC cluster                   | $J_{VGCC-diff} = k_{VGCC-diff}(Ca_{AZ}^{2+} - Ca_{cyt}^{2+})$                                                                                                                                                                                                |
| ER—AZ Coupling                                                     | $J_{coupling} = V_c \frac{(Ca_{AZ}^{2+} - \bar{k}(Ca_{IP_3Rn}^{2+}))}{Ca_{AZ}^{2+} - K_c^2}$                                                                                                                                                                 |
| VGCC [6]                                                           | $J_{VGCC} = \frac{-I_{Ca^{2+}}}{zFV_{cell}}$<br>$I_{Ca^{2+}} = \text{channel density} \cdot \text{cluster area} \cdot I_s$<br>$I_s = gP_o(V - E_{Ca^{2+}}), P_o = N_{open}/N_{VGCC}$<br>$\text{channel density} = \frac{N_{VGCC}}{(AZ_{area} \cdot N_{AZ})}$ |

826

827

828

829 **Table 2.** Parameter values for the  $Ca^{2+}$  dynamics.

| Parameters               | Description                                      | Value/Units                                                       | Notes                |
|--------------------------|--------------------------------------------------|-------------------------------------------------------------------|----------------------|
| <b>Cellular</b>          |                                                  |                                                                   |                      |
| $J_{leakin}$             | Plasma membrane leak influx                      | $0.03115 \mu\text{M}\cdot\text{ms}^{-1}$                          | From [67]            |
| $V_{leakin}$             | R/SOCC flux coefficient                          | $0.2 \text{ ms}^{-1}$                                             | From [67]            |
| $k_{IPR-diff}$           | $Ca_{IP_3R_n}^{2+}$ diffusional flux coefficient | $10 \text{ ms}^{-1}$                                              | From [67]            |
| $k_{IPR}$                | IP <sub>3</sub> R flux coefficient               | $5 \text{ ms}^{-1}$                                               | Modified from [67]   |
| $N_{IPR}$                | Total number of IP <sub>3</sub> R channels       | 10                                                                |                      |
| $k_{ER-leak}$            | ER-leak flux coefficient                         | $0.0022 \text{ ms}^{-1}$                                          | Modified from [67]   |
| <b>PMCA</b>              |                                                  |                                                                   |                      |
| $V_{PMCA}$               | Maximum capacity of PMCA                         | $3.195 \mu\text{M}\cdot\text{ms}^{-1}$                            | Modified from [67]   |
| $K_{PMCA}$               | Half activation PMCA constant                    | $0.5 \mu\text{M}$                                                 | From [67]            |
| $n_P$                    | Hill coefficient of PMCA                         | 2                                                                 | From [67]            |
| <b>SERCA</b>             |                                                  |                                                                   |                      |
| $V_{SERCA}$              | Maximum capacity of SERCA                        | $10 \mu\text{M}\cdot\text{ms}^{-1}$                               | From [67]            |
| $K_{SERCA}$              | Half maximal activation SERCA constant           | $0.26 \mu\text{M}$                                                | From [67]            |
| $n_S$                    | Hill coefficient of SERCA                        | 1.75                                                              | From [67]            |
| <b>VGCC and Coupling</b> |                                                  |                                                                   |                      |
| $k_{VGCC-diff}$          | $Ca_{AZ}^{2+}$ diffusional flux coefficient      | $0.071 \text{ ms}^{-1}$                                           |                      |
| $V_{cell}$               | Terminal volume                                  | $1.22 \times 10^{-6} \text{ L}$                                   | Modified from [6]    |
| $cluster\ area$          | Area of VGCC cluster                             | $0.001963 \mu\text{m}^2$                                          | Modified from [6]    |
| $AZ_{area}$              | Active zone area                                 | $0.04 \mu\text{m}^2$                                              | Modified from [2, 6] |
| $N_{AZ}$                 | Active zone number                               | 1.3                                                               | Modified from [6]    |
| $V_c$                    | Maximum capacity of transfer component           | $118 \mu\text{M}\cdot\text{ms}^{-1}$                              |                      |
| $\bar{k}$                | Concentrating power of the transfer components.  | High coupling: $15 \mu\text{M}$<br>Low coupling: $5 \mu\text{M}$  |                      |
| $K_c$                    | Half-maximal transfer rate                       | High coupling: $10 \mu\text{M}$<br>Low coupling: $20 \mu\text{M}$ |                      |

830

831

832 **Table 3.** Additional parameters used in the  $\text{Ca}^{2+}$  dynamics.

| Parameter                            | Value / Units      | Notes                                        |
|--------------------------------------|--------------------|----------------------------------------------|
| Resting cytosol [ $\text{Ca}^{2+}$ ] | 0.1 $\mu\text{M}$  |                                              |
| Resting AZ [ $\text{Ca}^{2+}$ ]      | 0.05 $\mu\text{M}$ |                                              |
| Resting Total [ $\text{Ca}^{2+}$ ]   | 56 $\mu\text{M}$   |                                              |
| Resting [ $\text{IP}_3$ ]            | 0.1 $\mu\text{M}$  |                                              |
| Extracellular [ $\text{Ca}^{2+}$ ]   | 2.0 mM             |                                              |
| $\delta_1$                           | 100                | Cytoplasmic to ER microdomain volume ratio   |
| $\delta_2$                           | 10                 | Cytoplasmic to ER volume ratio               |
| $\delta_3$                           | 60                 | Cytoplasmic to VGCC microdomain volume ratio |

833

834

835 **Table 4.** IP<sub>3</sub> fluxes in the model.

| Flux (reference)                          | Equation                                                                                                                                                                                                                                                                                                                                                                                   |
|-------------------------------------------|--------------------------------------------------------------------------------------------------------------------------------------------------------------------------------------------------------------------------------------------------------------------------------------------------------------------------------------------------------------------------------------------|
| PLC <sub>δ</sub> [112, 114]               | $J_{PLC} = \bar{V}_{PLC} \frac{(Ca_{cyt}^{2+})^2}{(Ca_{cyt}^{2+})^2 + K_{PLC}^2}$ $\bar{V}_{PLC} = V_{PLC} PLC$ $V_{PLC} = V_0 + V_Q \frac{q^2}{q^2 + K_Q^2}$ $q = H(t - t_1) * A\beta * e^{-r(t-t_1)H(t-t_1)}$ $\rho = V_R \frac{q}{q + K_R}$ $\frac{d}{dt} PLC = k_{f_{PLC}} G (PLC_{tot} - PLC) - k_{d_{PLC}} PLC$ $\frac{d}{dt} G = k_{f_G} (\rho + \delta) (G_{tot} - G) - k_{d_G} G$ |
| IP <sub>3</sub> Degradation [112]         | $J_{deg} = \left( \eta \frac{(Ca_{cyt}^{2+})^2}{(Ca_{cyt}^{2+})^2 + K_{IP_3k}^2} + (1 - \eta) \right) IP_3$ $\eta = k_{3k} / (k_{3k} + k_{5p})$                                                                                                                                                                                                                                            |
| Time constant of IP <sub>3</sub> turnover | $\tau_{IP_3} = 1 / (k_{3k} + k_{5p})$                                                                                                                                                                                                                                                                                                                                                      |

836

837 **Table 5.** Transition rates used in the IP<sub>3</sub>R model

| Rate/parameter       | Equation                                                                                                                                                                                                                                                                                                                                                                                                                                                                                                                                                                                                                                                                                                                                                                                                                                                                                                                                                                                                                                                  |
|----------------------|-----------------------------------------------------------------------------------------------------------------------------------------------------------------------------------------------------------------------------------------------------------------------------------------------------------------------------------------------------------------------------------------------------------------------------------------------------------------------------------------------------------------------------------------------------------------------------------------------------------------------------------------------------------------------------------------------------------------------------------------------------------------------------------------------------------------------------------------------------------------------------------------------------------------------------------------------------------------------------------------------------------------------------------------------------------|
| Transition rates     | $k_{RA} = \left[ 1 \times \left( \frac{1}{j_{01}[Ca^{2+}]_c} + \frac{1}{j_{12}([Ca^{2+}]_c)^2} \right) \right]^{-1}$ $k_{AR} = \left[ K_A([Ca^{2+}]_c)^2 \times \left( \frac{1}{j_{01}[Ca^{2+}]_c} + \frac{1}{j_{12}([Ca^{2+}]_c)^2} \right) \right]^{-1}$ $k_{AO} = \left[ K_A([Ca^{2+}]_c)^2 \times \left( \frac{1}{j_{22}([Ca^{2+}]_c)^2} \right) \right]^{-1}$ $k_{OA} = \left[ K_O([Ca^{2+}]_c)^2 \times \left( \frac{1}{j_{22}([Ca^{2+}]_c)^2} \right) \right]^{-1}$ $k_{OI} = \left[ K_O([Ca^{2+}]_c)^2 \times \left( \frac{1}{j_{23}([Ca^{2+}]_c)^3} + \frac{1}{j_{45}([Ca^{2+}]_c)^5} \right) \right]^{-1}$ $k_{IO} = \left[ K_I([Ca^{2+}]_c)^5 \times \left( \frac{1}{j_{23}([Ca^{2+}]_c)^3} + \frac{1}{j_{45}([Ca^{2+}]_c)^5} \right) \right]^{-1}$ $k_{RI} = \left[ 1 \times \left( \frac{1}{\tilde{j}_{01}[Ca^{2+}]_c} + \frac{1}{\tilde{j}_{45}([Ca^{2+}]_c)^5} \right) \right]^{-1}$ $k_{IR} = \left[ K_I([Ca^{2+}]_c)^5 \times \left( \frac{1}{\tilde{j}_{01}[Ca^{2+}]_c} + \frac{1}{\tilde{j}_{45}([Ca^{2+}]_c)^5} \right) \right]^{-1}$ |
| Occupancy parameters | $K_O = a_1 \frac{[IP_3]^{n_O}}{[IP_3]^{n_O} + K_{Od}^{n_O}}$ $K_A = a_2 \frac{[IP_3]^{n_A}}{[IP_3]^{n_A} + K_{Ad}^{n_A}}$ $K_I = a_2 \frac{[IP_3]^{n_I}}{[IP_3]^{n_I} + K_{Id}^{n_I}}$                                                                                                                                                                                                                                                                                                                                                                                                                                                                                                                                                                                                                                                                                                                                                                                                                                                                    |

838

839 **Table 6.** Parameter values for the IP<sub>3</sub> dynamics and IP<sub>3</sub>R

| Parameter                   | Description                                                     | WT                                                      | AD                                                         | Notes               |
|-----------------------------|-----------------------------------------------------------------|---------------------------------------------------------|------------------------------------------------------------|---------------------|
| <b>IP<sub>3</sub> Model</b> |                                                                 |                                                         |                                                            |                     |
| $V_0$                       | PLC-mediated IP <sub>3</sub> production                         | 0.15 $\mu\text{M}$                                      | 0.19 $\mu\text{M}$                                         | From [114]          |
| $V_Q$                       | Control parameter for influence of A $\beta$ on IP <sub>3</sub> | 7.82 $\mu\text{M}$                                      | 380 $\mu\text{M}$                                          | From [114]          |
| $K_Q$                       | PLC dissociation constant                                       | 0.0086 $\mu\text{g/mL}$                                 | 0.0086 $\mu\text{g/mL}$                                    | From [114]          |
| $K_{IP_3k}$                 | Half-activation for 3-kinase                                    | 0.6 $\mu\text{M}$                                       | 1.6 $\mu\text{M}$                                          | From [114]          |
| $K_{PLC}$                   | PLC sensitivity to Ca <sup>2+</sup>                             | 0.01 $\mu\text{M}$                                      | 0.016 $\mu\text{M}$                                        | From [114]          |
| $k_{3k}$                    | IP <sub>3</sub> phosphorylation rate                            | 1.5 $\mu\text{s}^{-1}$                                  | 0.7 $\mu\text{s}^{-1}$                                     | From [114]          |
| $k_{5p}$                    | IP <sub>3</sub> dephosphorylation rate                          | 0.01 $\mu\text{s}^{-1}$                                 | 0.005 $\mu\text{s}^{-1}$                                   | From [114]          |
| <b>PLC</b>                  |                                                                 |                                                         |                                                            |                     |
| $k_{fPLC}$                  | PLC-protein activation rate                                     | 0.35 $\mu\text{s}^{-1}$                                 | 0.75 $\mu\text{s}^{-1}$                                    | From [114]          |
| $k_{bPLC}$                  | PLC-protein deactivation rate                                   | 22 $\mu\text{s}^{-1}$                                   | 200 $\mu\text{s}^{-1}$                                     | Modified from [114] |
| $PLC_{tot}$                 | Scaled total number of PLC                                      | 1                                                       | 1                                                          | From [114]          |
| <b>G-Protein</b>            |                                                                 |                                                         |                                                            |                     |
| $k_{fG}$                    | G-protein activation rate                                       | 0.33 $\mu\text{s}^{-1}$                                 | 0.047 $\mu\text{s}^{-1}$                                   | From [114]          |
| $k_{bG}$                    | G-protein deactivation rate                                     | 2.17 $\mu\text{s}^{-1}$                                 | 4.7 $\mu\text{s}^{-1}$                                     | From [114]          |
| $\delta$                    | G-protein intrinsic activity                                    | 0.01                                                    | 0.012                                                      | From [114]          |
| $V_R$                       | Maximal G-protein activation                                    | 7.4                                                     | 10                                                         | From [114]          |
| $K_R$                       | A $\beta$ producing half-activation                             | 4467 $\mu\text{g/mL}$                                   | 2000 $\mu\text{g/mL}$                                      | From [114]          |
| $G_{tot}$                   | Scaled total number of G-protein                                | 1                                                       | 1                                                          | From [114]          |
| <b>IP<sub>3</sub>R</b>      |                                                                 |                                                         |                                                            |                     |
| $a_1$                       |                                                                 | 17.05043 $\mu\text{M}^{-2}$                             | 1.108278 $\times 10^2$ $\mu\text{M}^{-2}$                  | Fit                 |
| $n_O$                       |                                                                 | 2.473407                                                | 2.473407                                                   | Fit                 |
| $K_{Od}$                    |                                                                 | 0.909078 $\mu\text{M}$                                  | 0.909078 $\mu\text{M}$                                     | Fit                 |
| $a_2$                       |                                                                 | 18.49186 $\mu\text{M}^{-2}$                             | 18.49186 $\mu\text{M}^{-2}$                                | Fit                 |
| $n_A$                       |                                                                 | 0.093452                                                | 0.093452                                                   | Fit                 |
| $K_{Ad}$                    |                                                                 | 1.955650 $\mu\text{M}$                                  | 1.955650 $\mu\text{M}$                                     | Fit                 |
| $a_3$                       |                                                                 | 2.340259 $\times 10^2$ $\mu\text{M}^{-5}$               | 1.4041556 $\times 10^2$ $\mu\text{M}^{-5}$                 | Fit                 |
| $n_I$                       |                                                                 | 56.84823                                                | 56.84823                                                   | Fit                 |
| $K_{Id}$                    |                                                                 | 0.089938 $\mu\text{M}$                                  | 0.089938 $\mu\text{M}$                                     | Fit                 |
| $j_{01}$                    |                                                                 | 3.031635 $\times 10^2$ $\mu\text{M}^{-1}\text{ms}^{-1}$ | 3.031635 $\times 10^2$ $\mu\text{M}^{-1}\text{ms}^{-1}$    | Fit                 |
| $j_{12}$                    |                                                                 | 3.230063 $\times 10^2$ $\mu\text{M}^{-2}\text{ms}^{-1}$ | 3.230063 $\times 10^2$ $\mu\text{M}^{-2}\text{ms}^{-1}$    | Fit                 |
| $j_{22}$                    |                                                                 | 4.814111 $\mu\text{M}^{-2}\text{ms}^{-1}$               | 5.3978052 $\mu\text{M}^{-2}\text{ms}^{-1}$                 | Fit                 |
| $j_{23}$                    |                                                                 | 5.356155 $\mu\text{M}^{-3}\text{ms}^{-1}$               | 2.0652269 $\times 10^3$ $\mu\text{M}^{-3}\text{ms}^{-1}$   | Fit                 |
| $j_{45}$                    |                                                                 | 5.625616 $\mu\text{M}^{-5}\text{ms}^{-1}$               | 5.4319289 $\mu\text{M}^{-5}\text{ms}^{-1}$                 | Fit                 |
| $\tilde{j}_{01}$            |                                                                 | 3.013284 $\times 10^2$ $\mu\text{M}^{-1}\text{ms}^{-1}$ | 3.013284 $\times 10^2$ $\mu\text{M}^{-1}\text{ms}^{-1}$    | Fit                 |
| $\tilde{j}_{45}$            |                                                                 | 2.648741 $\mu\text{M}^{-5}\text{ms}^{-1}$               | 8.512829 $\times 10^{-8}$ $\mu\text{M}^{-5}\text{ms}^{-1}$ | Fit                 |

840 **Table 7.** Parameter values for membrane potential equations.

| Parameter       | Value / Units                                       | Description                                                                      |
|-----------------|-----------------------------------------------------|----------------------------------------------------------------------------------|
| $C_m$           | 1 $\mu\text{F}/\text{cm}^2$                         | Membrane Capacitance                                                             |
| $g_{Na}$        | 120 $\text{mS}/\text{cm}^2$                         | Maximum Conductance for active $\text{Na}^+$ channels                            |
| $g_{Na_{leak}}$ | 0.0175 $\text{mS}/\text{cm}^2$                      | Conductance for $\text{Na}^+$ passive leak channels                              |
| $g_K$           | 36 $\text{mS}/\text{cm}^2$                          | Maximum Conductance for active $\text{K}^+$ channels                             |
| $g_{K_{leak}}$  | 0.05 $\text{mS}/\text{cm}^2$                        | Conductance for $\text{K}^+$ passive leak channels                               |
| $g_{Cl_{leak}}$ | 0.05 $\text{mS}/\text{cm}^2$                        | Conductance for $\text{Cl}^-$ passive leak channels                              |
| $\phi$          | 5.0                                                 |                                                                                  |
| $g_{AHP}$       | 0.01                                                |                                                                                  |
| $\alpha_n$      | $\frac{0.01(V + 34)}{1 - \exp(-\frac{V + 34}{10})}$ | Forward rate for $\text{K}^+$ current activation gating variable                 |
| $\beta_n$       | $0.125 \exp(-\frac{V + 44}{80})$                    | Backward rate for $\text{K}^+$ current activation gating variable                |
| $\alpha_h$      | $0.07 \exp(-\frac{V + 44}{20})$                     | Forward rate for $\text{Na}^+$ current inactivation gating variable              |
| $\beta_h$       | $\frac{1}{1 + \exp(-\frac{V + 14}{10})}$            | Backward rate for $\text{Na}^+$ current inactivation gating variable             |
| $\alpha_m$      | $\frac{0.1(V + 30)}{1 - \exp(-\frac{V + 30}{10})}$  | Forward rate for $\text{Na}^+$ current activation gating variable                |
| $\beta_m$       | $4 \exp(-\frac{V + 55}{18})$                        | Backward rate for $\text{Na}^+$ current activation gating variable               |
| $m_\infty$      | $\frac{\alpha_m}{\alpha_m + \beta_m}$               | Occupancy of $\text{Na}^+$ activation gating variable                            |
|                 | $\frac{dn}{dt} = \phi(\alpha_n(1 - n) - \beta_n n)$ | Evolution occupancy of gating $\text{K}^+$ current gating variable               |
|                 | $\frac{dh}{dt} = \phi(\alpha_h(1 - h) - \beta_h h)$ | Evolution occupancy of gating $\text{Na}^+$ current inactivation gating variable |

841



842 **Table 8.** Reaction rates for kinetic schemes for VGCC

| Parameter                                            | Value / Units                            | Notes         |
|------------------------------------------------------|------------------------------------------|---------------|
| $\alpha_{10}, \alpha_{20}, \alpha_{30}, \alpha_{40}$ | 4.04, 6.70, 4.39, 17.33 ms <sup>-1</sup> | From [70, 75] |
| $\beta_{10}, \beta_{20}, \beta_{30}, \beta_{40}$     | 2.88, 6.30, 8.16, 1.84 ms <sup>-1</sup>  | From [70, 75] |
| $k_1, k_2, k_3, k_4$                                 | 49.14, 42.08, 55.31, 26.55 mV            | From [70, 75] |

843

844

845 **Table 9.** Reaction rates for kinetic schemes for Exocytosis

| Parameter                  | Description                                | Value / Units                                       | Notes     |
|----------------------------|--------------------------------------------|-----------------------------------------------------|-----------|
| <b>Vesicle Recruitment</b> |                                            |                                                     |           |
| $k_{mob}$                  | Mobilization rate                          | $5.0 \times 10^{-5} \mu\text{M}^{-1}\text{ms}^{-1}$ | From [27] |
| $k_{demob}$                | Demobilization rate                        | $0.0022 \text{ms}^{-1}$                             | From [27] |
| $k_{priming}$              | Priming rate                               | $0.027990 \mu\text{M}^{-1}\text{ms}^{-1}$           | From [27] |
| $k_{unpr}$                 | Unpriming rate                             | $0.005356 \text{ms}^{-1}$                           | From [27] |
| $k_{attach}$               | Attachment rate                            | $0.0015 \mu\text{M}^{-1}\text{ms}^{-1}$             | Fit       |
| $k_{detach}$               | Detachment rate                            | $0.001158 \text{ms}^{-1}$                           | Fit       |
| $k_{RF}$                   | Refractoriness                             | $10.34^{-1} \text{ms}^{-1}$                         | Fit       |
| <b>Calcium sensor</b>      |                                            |                                                     |           |
| $\alpha$                   | Association rate for synchronous release   | $0.061200 \mu\text{M}^{-1}\text{ms}^{-1}$           | From [70] |
| $\beta$                    | Dissociation rate, synchronous release     | $2.32 \text{ms}^{-1}$                               | From [70] |
| $\lambda$                  | Association rate for Asynchronous release  | $0.002933 \mu\text{M}^{-1}\text{ms}^{-1}$           | Fit       |
| $\delta$                   | Dissociation rate for Asynchronous release | $0.014829 \text{ms}^{-1}$                           | Fit       |
| $\gamma_1$                 | Spontaneous release rate                   | $9 \times 10^{-6} \text{ms}^{-1}$                   | Fit       |
| $\gamma_2$                 | Synchronous release rate                   | $2.000008 \text{ms}^{-1}$                           | From [70] |
| $\gamma_3$                 | Asynchronous release rate                  | $a \cdot \gamma_2 \text{ms}^{-1}$                   | From [70] |
| $b$                        | Cooperativity factor                       | 0.250007                                            | From [70] |
| $a$                        |                                            | 0.025007                                            | From [70] |

846

## 847 **Acknowledgements**

848 This research was funded by National Institute of Health, grant number R01 AG053988 (to  
849 GU and AD)

850

## 851 **Competing Interests**

852 The authors declare no conflict of interest. The funders had no role in the design of the study;  
853 in the collection, analyses, or interpretation of data; in the writing of the manuscript, or in the  
854 decision to publish the results.

855

856

857

858

## 859   **References**

- 860           1.   Sun, J., Pang, Z. P., Qin, D., Fahim, A. T., Adachi, R., & Südhof, T. C. (2007). A  
861           dual Ca<sup>2+</sup> sensor model for neurotransmitter release in a central synapse. *Nature*  
862           450, 676—682. <https://doi.org/10.1038/nature06308>
- 863           2.   Schikorski, T., & Stevens, C. F. (1997). Quantitative Ultrastructural Analysis of  
864           Hippocampal Excitatory Synapses. *The Journal of Neuroscience*, 17(15), 5858–  
865           5867. <https://doi.org/10.1523/jneurosci.17-15-05858.1997>
- 866           3.   Sätzler, K., Söhl, L. F., Bollmann, J. H., Borst, J. G. G., Frotscher, M., Sakmann,  
867           B., & Lübke, J. H. R. (2002). Three-Dimensional Reconstruction of a Calyx of  
868           Held and Its Postsynaptic Principal Neuron in the Medial Nucleus of the Trapezoid  
869           Body. *The Journal of Neuroscience*, 22(24), 10567–10579.  
870           <https://doi.org/10.1523/jneurosci.22-24-10567.2002>
- 871           4.   Otsu, Y., & Murphy, T. H. (2003). Miniature Transmitter Release: Accident of  
872           Nature or Careful Design? *Science Signaling*, 2003 (211), pe54–pe54.  
873           <https://doi.org/10.1126/stke.2112003pe54>
- 874           5.   Murthy, V. N., & Stevens, C. F.. (1999). Reversal of synaptic vesicle docking at  
875           central synapses. *Nature Neuroscience*, 2(6), 503–507.  
876           <https://doi.org/10.1038/9149>
- 877           6.   Ermolyuk, Y. S., Alder, F. G., Surges, R., Pavlov, I. Y., Timofeeva, Y., Kullmann,  
878           D. M., & Volynski, K. E.. (2013). Differential triggering of spontaneous glutamate  
879           release by P/Q-, N- and R-type Ca<sup>2+</sup> channels. *Nature Neuroscience*, 16(12),  
880           1754–1763. <https://doi.org/10.1038/nn.3563>
- 881           7.   De Juan-Sanz, J., Holt, G. T., Schreiter, E. R., De Juan, F., Kim, D. S., & Ryan, T.  
882           A.. (2017). Axonal Endoplasmic Reticulum Ca<sup>2+</sup> Content Controls Release  
883           Probability in CNS Nerve Terminals. *Neuron*, 93(4), 867–881.e6.  
884           <https://doi.org/10.1016/j.neuron.2017.01.010>
- 885           8.   Karagas, N. E., & Venkatachalam, K.. (2019). Roles for the Endoplasmic  
886           Reticulum in Regulation of Neuronal Calcium Homeostasis. *Cells*, 8(10), 1232.  
887           <https://doi.org/10.3390/cells8101232>
- 888           9.   Singh, N., Bartol, T., Levine, H., Sejnowski, T., & Nadkarni, S.. (2021).  
889           Presynaptic endoplasmic reticulum regulates short-term plasticity in hippocampal  
890           synapses. *Communications Biology*, 4(1). [https://doi.org/10.1038/s42003-021-](https://doi.org/10.1038/s42003-021-01761-7)  
891           01761-7

- 892 10. Busche, M. A., Chen, X., Henning, H. A., Reichwald, J., Staufenbiel, M., Sakmann,  
893 B., & Konnerth, A.. (2012). Critical role of soluble amyloid- $\beta$  for early  
894 hippocampal hyperactivity in a mouse model of Alzheimer's disease. *Proceedings*  
895 *of the National Academy of Sciences*, 109(22), 8740–8745.  
896 <https://doi.org/10.1073/pnas.1206171109>
- 897 11. Stutzmann, G.E, Caccamo. A., LaFerla, F. M., & Parker, I. (2004). Dysregulated  
898 IP3 Signaling in Cortical Neurons of Knock-In Mice Expressing an Alzheimer's-  
899 Linked Mutation in Presenilin1 Results in Exaggerated Ca<sup>2+</sup> Signals and Altered  
900 Membrane Excitability. *The Journal of Neuroscience* 24, 508–513  
901 doi:10.1523/jneurosci.4386-03.2004
- 902 12. Zatti, G., Burgo, A., Giacomello, M., Barbiero, L., Ghidoni, R., Sinigaglia, G. &  
903 Fasolato, C.. (2006). Presenilin mutations linked to familial Alzheimer's disease  
904 reduce endoplasmic reticulum and Golgi apparatus calcium levels. *Cell calcium*,  
905 39(6), 539-550. doi:10.1016/j.ceca.2006.03.002
- 906 13. Berridge, M. J.. (2010). Calcium hypothesis of Alzheimer's disease. *Pflügers*  
907 *archiv - european journal of physiology*, 459(3), 441-449. doi:10.1007/s00424-  
908 009-0736-1
- 909 14. Karagas, N. E. & Venkatachalam, K.. (2019). Roles for the Endoplasmic Reticulum  
910 in Regulation of Neuronal Calcium Homeostasis. *Cells*, 8(10), 1232.  
911 doi:10.3390/cells8101232
- 912 15. Lopez, J. R., Lyckman, A., Oddo, S., Laferla, F. M., Querfurth, H. W. & Shtifman,  
913 A.. (2008). Increased intraneuronal resting [Ca<sup>2+</sup>] in adult Alzheimer's disease  
914 mice. *Journal of neurochemistry*, 105(1), 262-271. doi:10.1111/j.1471-  
915 4159.2007.05135.x
- 916 16. Mak, D.-O. D., Cheung, K.-H., Toglia, P., Foskett, J. K. & Ullah, G.. (2015).  
917 Analyzing and Quantifying the Gain-of-Function Enhancement of IP3 Receptor  
918 Gating by Familial Alzheimer's Disease-Causing Mutants in Presenilins. *PLOS*  
919 *computational biology*, 11(10), e1004529. doi:10.1371/journal.pcbi.1004529
- 920 17. Cheung, K.-H., Shineman, D., Müller, M., Cárdenas, C., Mei, L., Yang, J. &  
921 Foskett, J. K.. (2008). Mechanism of Ca<sup>2+</sup> Disruption in Alzheimer's Disease by  
922 Presenilin Regulation of InsP3 Receptor Channel Gating. *Neuron*, 58(6), 871-883.  
923 doi:10.1016/j.neuron.2008.04.015

- 924 18. Stanley, E. F.. (1997). The calcium channel and the organization of the presynaptic  
925 transmitter release face. *Trends in neurosciences*, 20(9), 404-409.  
926 doi:10.1016/s0166-2236(97)01091-6
- 927 19. Chen, M., Van Hook, M. J. & Thoreson, W. B.. (2015). Ca<sup>2+</sup> Diffusion through  
928 Endoplasmic Reticulum Supports Elevated Intraterminal Ca<sup>2+</sup> Levels Needed to  
929 Sustain Synaptic Release from Rods in Darkness. *The journal of neuroscience*,  
930 35(32), 11364-11373. doi:10.1523/jneurosci.0754-15.2015
- 931 20. Chen, M., Križaj, D., & Thoreson, W.B. (2014). Intracellular calcium stores drive  
932 slow non-ribbon vesicle release from rod photoreceptors. *Front. Cell. Neurosci.* 8,  
933 20 <https://doi.org/10.3389/fncel.2014.00020>
- 934 21. Emptage, N. J., Reid, C. A. & Fine, A.. (2001). Calcium Stores in Hippocampal  
935 Synaptic Boutons Mediate Short-Term Plasticity, Store-Operated Ca<sup>2+</sup> Entry, and  
936 Spontaneous Transmitter Release. *Neuron*, 29(1), 197-208. doi:10.1016/s0896-  
937 6273(01)00190-8
- 938 22. Collin, T., Marty, A. & Llano, I.. (2005). Presynaptic calcium stores and synaptic  
939 transmission. *Current opinion in neurobiology*, 15(3), 275-281.  
940 doi:10.1016/j.conb.2005.05.003
- 941 23. Dobrunz, L. E., Huang, E. P. et Stevens, C. F.. (1997). Very short-term plasticity  
942 in hippocampal synapses. *Proceedings of the national academy of sciences*, 94(26),  
943 14843-14847. doi:10.1073/pnas.94.26.14843
- 944 24. Dobrunz, L. E. & Stevens, C. F.. (1997). Heterogeneity of Release Probability,  
945 Facilitation, and Depletion at Central Synapses. *Neuron*, 18(6), 995-1008.  
946 doi:10.1016/s0896-6273(00)80338-4
- 947 25. Debanne, D., Guérineau, N. C., Gähwiler, B. H. & Thompson, S. M.. (1996).  
948 Paired-pulse facilitation and depression at unitary synapses in rat hippocampus:  
949 quantal fluctuation affects subsequent release.. *The journal of physiology*, 491(1),  
950 163-176. doi:10.1113/jphysiol.1996.sp021204
- 951 26. Citri, A. & Malenka, R. C.. (2008). Synaptic Plasticity: Multiple Forms, Functions,  
952 and Mechanisms. *Neuropsychopharmacology*, 33(1), 18-41.  
953 doi:10.1038/sj.npp.1301559
- 954 27. Pan, B. & Zucker, R. S.. (2009). A General Model of Synaptic Transmission and  
955 Short-Term Plasticity. *Neuron*, 62(4), 539-554. doi:10.1016/j.neuron.2009.03.025

- 956 28. Neher, E. et Sakaba, T.. (2008). Multiple Roles of Calcium Ions in the Regulation  
957 of Neurotransmitter Release. *Neuron*, 59(6), 861-872.  
958 doi:10.1016/j.neuron.2008.08.019
- 959 29. Zucker, R. S. & Regehr, W. G.. (2002). Short-Term Synaptic Plasticity. Annual  
960 review of physiology, 64(1), 355-405.  
961 doi:10.1146/annurev.physiol.64.092501.114547
- 962 30. Debanne, D., Guérineau, N. C., Gähwiler, B. H. & Thompson, S. M.. (1996).  
963 Paired-pulse facilitation and depression at unitary synapses in rat hippocampus:  
964 quantal fluctuation affects subsequent release.. *The journal of physiology*, 491(1),  
965 163-176. doi:10.1113/jphysiol.1996.sp021204
- 966 31. Guo, D. & Li, C.. (2012). Population rate coding in recurrent neuronal networks  
967 with unreliable synapses. *Cognitive neurodynamics*, 6(1), 75-87.  
968 doi:10.1007/s11571-011-9181-x
- 969 32. Mark S. Goldman. (2004). Enhancement of Information Transmission Efficiency  
970 by Synaptic Failures. *Neural Comput* 16 (6), 1137–1162 doi:  
971 <https://doi.org/10.1162/089976604773717568>
- 972 33. Maass, W. & Natschläger, T.. (2000). A Model for Fast Analog Computation Based  
973 on Unreliable Synapses. *Neural computation*, 12(7), 1679-1704.  
974 doi:10.1162/089976600300015303
- 975 34. Zott, B., Simon, M. M., Hong, W., Unger, F., Chen-Engerer, H.-J., Frosch, M. P.  
976 & Konnerth, A.. (2019). A vicious cycle of  $\beta$  amyloid–dependent neuronal  
977 hyperactivation. *Science*, 365(6453), 559-565. doi:10.1126/science.aay0198
- 978 35. Busche, M. A., Chen, X., Henning, H. A., Reichwald, J., Staufenbiel, M., Sakmann,  
979 B., & Konnerth, A.. (2012). Critical role of soluble amyloid- $\beta$  for early  
980 hippocampal hyperactivity in a mouse model of Alzheimer’s disease. *Proceedings*  
981 *of the National Academy of Sciences*, 109(22), 8740–8745.  
982 <https://doi.org/10.1073/pnas.1206171109>
- 983 36. Busche, M. A. & Konnerth, A.. (2015). Neuronal hyperactivity - A key defect in  
984 Alzheimer's disease?. *Bioessays*, 37(6), 624-632. doi:10.1002/bies.201500004
- 985 37. Kaeser, P. S. & Regehr, W. G.. (2014). Molecular Mechanisms for Synchronous,  
986 Asynchronous, and Spontaneous Neurotransmitter Release. *Annual review of*  
987 *physiology*, 76(1), 333-363. doi:10.1146/annurev-physiol-021113-170338

- 988 38. Hagler, D.J., & Goda, Y. (2001). Properties of synchronous and asynchronous  
989 release during pulse train depression in cultured hippocampal neurons. *J.*  
990 *Neurophysiol.*85, 2324–2334. <https://doi.org/10.1152/jn.2001.85.6.2324>
- 991 39. Yang, L., Wang, B., Long, C., Wu, G. & Zheng, H.. (2007). Increased  
992 asynchronous release and aberrant calcium channel activation in amyloid precursor  
993 protein deficient neuromuscular synapses. *Neuroscience*, 149(4), 768-778.  
994 doi:10.1016/j.neuroscience.2007.08.025
- 995 40. Atluri, P. P. & Regehr, W. G.. (1998). Delayed Release of Neurotransmitter from  
996 Cerebellar Granule Cells. *The journal of neuroscience*, 18(20), 8214-8227.  
997 doi:10.1523/jneurosci.18-20-08214.1998
- 998 41. Lu, T., & Trussell, L. O.. (2000). Inhibitory Transmission Mediated by  
999 Asynchronous Transmitter Release. *Neuron*, 26(3), 683–694.  
1000 [https://doi.org/10.1016/s0896-6273\(00\)81204-0Wu](https://doi.org/10.1016/s0896-6273(00)81204-0Wu)
- 1001 42. Wu, Y., Whiteus, C., Xu, C. S., Hayworth, K. J., Weinberg, R. J., Hess, H. F., &  
1002 De Camilli, P.. (2017). Contacts between the endoplasmic reticulum and other  
1003 membranes in neurons. *Proceedings of the National Academy of Sciences*,  
1004 114(24), E4859–E4867. <https://doi.org/10.1073/pnas.1701078114>
- 1005 43. Ringsevjen, H., Umbach Hansen, H. M., Hussain, S., Hvalby, Ø., Jensen, V.,  
1006 Walaas, S. I., & Davanger, S.. (2019). Presynaptic increase in IP3 receptor type 1  
1007 concentration in the early phase of hippocampal synaptic plasticity. *Brain*  
1008 *Research*, 1706, 125–134. <https://doi.org/10.1016/j.brainres.2018.10.030>
- 1009 44. Mattson, M. P., Laferla, F. M., Chan, S. L., Leissring, M. A., Shepel, P. N., &  
1010 Geiger, J. D.. (2000). Calcium signaling in the ER: its role in neuronal plasticity  
1011 and neurodegenerative disorders. *Trends in Neurosciences*, 23(5), 222–229.  
1012 [https://doi.org/10.1016/s0166-2236\(00\)01548-4](https://doi.org/10.1016/s0166-2236(00)01548-4)
- 1013 45. Groffen, A. J., Martens, S., Arazola, R. D., Cornelisse, L. N., Lozovaya, N., De  
1014 Jong, A. P. H., Goriounova, N. A., Habets, R. L. P., Takai, Y., Borst, J. G., Brose,  
1015 N., McMahon, H. T., & Verhage, M.. (2010). Doc2b Is a High-Affinity Ca<sup>2+</sup>  
1016 Sensor for Spontaneous Neurotransmitter Release. *Science*, 327(5973), 1614–  
1017 1618. <https://doi.org/10.1126/science.1183765>
- 1018 46. Eggermann, E., Bucurenciu, I., Goswami, S. P., & Jonas, P.. (2012). Nanodomain  
1019 coupling between Ca<sup>2+</sup> channels and sensors of exocytosis at fast mammalian  
1020 synapses. *Nature Reviews Neuroscience*, 13(1), 7–21.  
1021 <https://doi.org/10.1038/nrn3125>

- 1022 47. Vyleta, N. P., & Smith, S. M.. (2011). Spontaneous Glutamate Release Is  
1023 Independent of Calcium Influx and Tonicly Activated by the Calcium-Sensing  
1024 Receptor. *The Journal of Neuroscience*, 31(12), 4593–4606.  
1025 <https://doi.org/10.1523/jneurosci.6398-10.2011>
- 1026 48. Fujii, S., Matsumoto, M., Igarashi, K., Kato, H., & Mikoshiba, K.. (2000). Synaptic  
1027 Plasticity in Hippocampal CA1 Neurons of Mice Lacking Type 1 Inositol-1,4,5-  
1028 Trisphosphate Receptors. *Learning & Memory*, 7(5), 312–320.  
1029 <https://doi.org/10.1101/lm.34100Ringsevjen>,
- 1030 49. H., Umbach Hansen, H. M., Hussain, S., Hvalby, Ø., Jensen, V., Walaas, S. I., &  
1031 Davanger, S.. (2019). Presynaptic increase in IP3 receptor type 1 concentration in  
1032 the early phase of hippocampal synaptic plasticity. *Brain Research*, 1706, 125–134.  
1033 <https://doi.org/10.1016/j.brainres.2018.10.030>
- 1034 50. Nishiyama, M., Hong, K., Mikoshiba, K., Poo, M.-M., & Kato, K.. (2000). Calcium  
1035 stores regulate the polarity and input specificity of synaptic  
1036 modification. *Nature*, 408(6812), 584–588. <https://doi.org/10.1038/35046067>
- 1037 51. Ito, E., Oka, K., Etcheberrigaray, R., Nel-son, T. J., McPhie, D. L., Tofel-Grehl, B.,  
1038 et al. (1994). Internal Ca<sup>2+</sup> mobilization is altered in fibroblasts from patients with  
1039 Alzheimer disease. *Proc. Natl. Acad. Sci. U.S.A.* 91, 534–538. doi:  
1040 10.1073/pnas.91.2.534
- 1041 52. Popugaeva, E., & Bezprozvanny, I.. (2013). Role of endoplasmic reticulum Ca<sup>2+</sup>  
1042 signaling in the pathogenesis of Alzheimer disease. *Frontiers in Molecular*  
1043 *Neuroscience*, 6. <https://doi.org/10.3389/fnmol.2013.00029>
- 1044 53. Popugaeva, E., Pchitskaya, E., & Bezprozvanny, I.. (2018). Dysregulation of  
1045 Intracellular Calcium Signaling in Alzheimer's Disease. *Antioxidants & Redox*  
1046 *Signaling*, 29(12), 1176–1188. <https://doi.org/10.1089/ars.2018.7506>
- 1047 54. Hisatsune, C., & Mikoshiba, K.. (2017). IP3receptor mutations and brain diseases  
1048 in human and rodents. *Journal of Neurochemistry*, 141(6), 790–807.  
1049 <https://doi.org/10.1111/jnc.13991>
- 1050 55. Kuchibhotla, K. V., Goldman, S. T., Lattarulo, C. R., Wu, H.-Y., Hyman, B. T., &  
1051 Bacsikai, B. J.. (2008). Aβ Plaques Lead to Aberrant Regulation of Calcium  
1052 Homeostasis In Vivo Resulting in Structural and Functional Disruption of  
1053 Neuronal Networks. *Neuron*, 59(2), 214–225.  
1054 <https://doi.org/10.1016/j.neuron.2008.06.008>



- 1055 56. Poejo, J., Salazar, J., Mata, A. M., & Gutierrez-Merino, C.. (2021). The Relevance  
1056 of Amyloid  $\beta$ -Calmodulin Complexation in Neurons and Brain Degeneration in  
1057 Alzheimer's Disease. *International Journal of Molecular Sciences*, 22(9), 4976.  
1058 <https://doi.org/10.3390/ijms22094976>
- 1059 57. Marchenko, S. M., Yarotskyy, V. V., Kovalenko, T. N., Kostyuk, P. G., & Thomas,  
1060 R. C.. (2005). Spontaneously active and InsP3-activated ion channels in cell nuclei  
1061 from rat cerebellar Purkinje and granule neurones. *The Journal of Physiology*,  
1062 565(3), 897–910. <https://doi.org/10.1113/jphysiol.2004.081299>
- 1063 58. Greotti, E., Capitanio, P., Wong, A., Pozzan, T., Pizzo, P., & Pendin, D.. (2019).  
1064 Familial Alzheimer's disease-linked presenilin mutants and intracellular  $Ca^{2+}$   
1065 handling: A single-organelle, FRET-based analysis. *Cell Calcium*, 79, 44–56.  
1066 <https://doi.org/10.1016/j.ceca.2019.02.005>
- 1067 59. Hanse, E., & Gustafsson, B.. (2001). Paired-Pulse Plasticity at the Single Release  
1068 Site Level: An Experimental and Computational Study. *The Journal of*  
1069 *Neuroscience*, 21(21), 8362–8369. [https://doi.org/10.1523/jneurosci.21-21-](https://doi.org/10.1523/jneurosci.21-21-08362.2001)  
1070 [08362.2001](https://doi.org/10.1523/jneurosci.21-21-08362.2001)
- 1071 60. Bacaj, T., Wu, D., Yang, X., Morishita, W., Zhou, P., Xu, W., Robert, & Thomas.  
1072 (2013). Synaptotagmin-1 and Synaptotagmin-7 Trigger Synchronous and  
1073 Asynchronous Phases of Neurotransmitter Release. *Neuron*, 80(4), 947–959.  
1074 <https://doi.org/10.1016/j.neuron.2013.10.026>
- 1075 61. Wen, H., Linhoff, M. W., Mcginley, M. J., Li, G.-L., Corson, G. M., Mandel, G.,  
1076 & Brehm, P.. (2010). Distinct roles for two synaptotagmin isoforms in synchronous  
1077 and asynchronous transmitter release at zebrafish neuromuscular junction.  
1078 *Proceedings of the National Academy of Sciences*, 107(31), 13906–13911.  
1079 <https://doi.org/10.1073/pnas.1008598107>
- 1080 62. Geppert M, Goda Y, Hammer RE, Li C, & Rosahl TW, et al. Synaptotagmin I: a  
1081 major  $Ca^{2+}$  sensor for transmitter release at a central synapse. *Cell*. 1994; 79:717–  
1082 727. [PubMed: 7954835]
- 1083 63. Yang, H., & Xu-Friedman, M. A.. (2010). Developmental Mechanisms for  
1084 Suppressing the Effects of Delayed Release at the Endbulb of Held. *The Journal of*  
1085 *Neuroscience*, 30(34), 11466–11475. [https://doi.org/10.1523/jneurosci.2300-](https://doi.org/10.1523/jneurosci.2300-10.2010)  
1086 [10.2010](https://doi.org/10.1523/jneurosci.2300-10.2010)
- 1087 64. Otsu, Y.. (2004). Competition between Phasic and Asynchronous Release for  
1088 Recovered Synaptic Vesicles at Developing Hippocampal Autaptic Synapses. *The*

- 1089 Journal of Neuroscience, 24(2), 420–433. <https://doi.org/10.1523/jneurosci.4452->  
1090 03.2004
- 1091 65. Maximov, A., & Südhof, T. C.. (2005). Autonomous Function of Synaptotagmin 1  
1092 in Triggering Synchronous Release Independent of Asynchronous Release.  
1093 Neuron, 48(4), 547–554. <https://doi.org/10.1016/j.neuron.2005.09.006>
- 1094 66. Wang, L.-Y., & Augustine, G. J.. (2015). Presynaptic nanodomains: a tale of two  
1095 synapses. Frontiers in Cellular Neuroscience, 8.  
1096 <https://doi.org/10.3389/fncel.2014.00455>
- 1097 67. Cao, P., Tan, X., Donovan, G., Sanderson, M. J., & Sneyd, J.. (2014). A  
1098 Deterministic Model Predicts the Properties of Stochastic Calcium Oscillations in  
1099 Airway Smooth Muscle Cells. PLOS Computational Biology, 10(8), e1003783.  
1100 <https://doi.org/10.1371/journal.pcbi.1003783>
- 1101 68. Laude, A. J., & Simpson, A. W. M.. (2009). Compartmentalized signalling: Ca<sup>2+</sup>  
1102 compartments, microdomains and the many facets of Ca<sup>2+</sup> signalling. The FEBS  
1103 Journal, 276(7), 1800–1816. <https://doi.org/10.1111/j.1742-4658.2009.06927.x>
- 1104 69. Heine, M., Heck, J., Ciuraszkiewicz, A., & Bikbaev, A.. (2020). Dynamic  
1105 compartmentalization of calcium channel signalling in neurons.  
1106 Neuropharmacology, 169, 107556.  
1107 <https://doi.org/10.1016/j.neuropharm.2019.02.038>
- 1108 70. Nadkarni, S., Bartol, T. M., Sejnowski, T. J., & Levine, H.. (2010). Modelling  
1109 Vesicular Release at Hippocampal Synapses. PLOS Computational Biology, 6(11),  
1110 e1000983. <https://doi.org/10.1371/journal.pcbi.1000983>
- 1111 71. Verkhatsky, A.. (2002). The endoplasmic reticulum and neuronal calcium  
1112 signalling. Cell Calcium, 32(5-6), 393–404.  
1113 <https://doi.org/10.1016/s0143416002001896>
- 1114 72. Deng, P.-Y., Rotman, Z., Jay, Cho, Y., Cui, J., Cavalli, V., Stanislav, & Vitaly.  
1115 (2013). FMRP Regulates Neurotransmitter Release and Synaptic Information  
1116 Transmission by Modulating Action Potential Duration via BK Channels. Neuron,  
1117 77(4), 696–711. <https://doi.org/10.1016/j.neuron.2012.12.018>
- 1118 73. Harraz, F. O., & Altier, C. (2014). STIM1-mediated bidirectional regulation of  
1119 Ca<sup>2+</sup> entry through voltage-gated calcium channels (VGCC) and calcium-release  
1120 activated channels (CRAC). *Frontiers in molecular neuroscience* 8, 43
- 1121 74. Wu, L., & Saggau, P.. (1994). Pharmacological identification of two types of  
1122 presynaptic voltage- dependent calcium channels at CA3-CA1 synapses of the

- 1123 hippocampus. *The Journal of Neuroscience*, 14(9), 5613–5622.  
1124 <https://doi.org/10.1523/jneurosci.14-09-05613.1994>
- 1125 75. Bischofberger, J., Geiger, J. R. P., & Jonas, P.. (2002). Timing and Efficacy of  
1126 Ca<sup>2+</sup>Channel Activation in Hippocampal Mossy Fiber Boutons. *The Journal of*  
1127 *Neuroscience*, 22(24), 10593–10602. [https://doi.org/10.1523/jneurosci.22-24-](https://doi.org/10.1523/jneurosci.22-24-10593.2002)  
1128 [10593.2002](https://doi.org/10.1523/jneurosci.22-24-10593.2002)
- 1129 76. Mochida, S., Westenbroek, R. E., Yokoyama, C. T., Zhong, H., Myers, S. J.,  
1130 Scheuer, T., Itoh, K., & Catterall, W. A.. (2003). Requirement for the synaptic  
1131 protein interaction site for reconstitution of synaptic transmission by P/Q-type  
1132 calcium channels. *Proceedings of the National Academy of Sciences*, 100(5),  
1133 2819–2824. <https://doi.org/10.1073/pnas.262787699>
- 1134 77. Kaeser, P. S., Deng, L., Wang, Y., Dulubova, I., Liu, X., Rizo, J., & Südhof, T. C..  
1135 (2011). RIM Proteins Tether Ca<sup>2+</sup> Channels to Presynaptic Active Zones via a  
1136 Direct PDZ-Domain Interaction. *Cell*, 144(2), 282–295.  
1137 <https://doi.org/10.1016/j.cell.2010.12.029>
- 1138 78. Holderith, N., Lorincz, A., Katona, G., Rózsa, B., Kulik, A., Watanabe, M., &  
1139 Nusser, Z.. (2012). Release probability of hippocampal glutamatergic terminals  
1140 scales with the size of the active zone. *Nature Neuroscience*, 15(7), 988–997.  
1141 <https://doi.org/10.1038/nn.3137>
- 1142 79. Keizer, J., & Levine, L.. (1996). Ryanodine receptor adaptation and Ca<sup>2+</sup>(-  
1143 )induced Ca<sup>2+</sup> release-dependent Ca<sup>2+</sup> oscillations. *Biophysical Journal*, 71(6),  
1144 3477–3487. [https://doi.org/10.1016/s0006-3495\(96\)79543-7](https://doi.org/10.1016/s0006-3495(96)79543-7)
- 1145 80. Zhang, C., Wu, B., Beglopoulos, V., Wines-Samuelson, M., Zhang, D., Dragatsis,  
1146 I., Südhof, T. C., & Shen, J.. (2009). Presenilins are essential for regulating  
1147 neurotransmitter release. *Nature*, 460(7255), 632–636.  
1148 <https://doi.org/10.1038/nature08177>
- 1149 81. Wu, B., Yamaguchi, H., Lai, F. A., & Shen, J.. (2013). Presenilins regulate calcium  
1150 homeostasis and presynaptic function via ryanodine receptors in hippocampal  
1151 neurons. *Proceedings of the National Academy of Sciences*, 110(37), 15091–  
1152 15096. <https://doi.org/10.1073/pnas.1304171110>
- 1153 82. Chakroborty, S., Kim, J., Schneider, C., Jacobson, C., Molgo, J., & Stutzmann, G.  
1154 E.. (2012). Early Presynaptic and Postsynaptic Calcium Signaling Abnormalities  
1155 Mask Underlying Synaptic Depression in Presymptomatic Alzheimer's Disease

- 1156 Mice. *The Journal of Neuroscience*, 32(24), 8341–8353.  
1157 <https://doi.org/10.1523/jneurosci.0936-12.2012>
- 1158 83. Johenning, F. W., Theis, A.-K., Pannasch, U., Rückl, M., Rüdiger, S., & Schmitz,  
1159 D.. (2015). Ryanodine Receptor Activation Induces Long-Term Plasticity of Spine  
1160 Calcium Dynamics. *PLOS Biology*, 13(6), e1002181.  
1161 <https://doi.org/10.1371/journal.pbio.1002181>
- 1162 84. Arias-Cavieres A. et al. (2018) Ryanodine Receptor-Mediated Calcium Release  
1163 Has a Key Role in Hippocampal LTD Induction. *Frontiers in cellular*  
1164 *neuroscience*, 12. 403 <https://doi.org/10.3389/fncel.2018.00403>
- 1165 85. Ferri, C. P., Prince, M., Brayne, C., Brodaty, H., Fratiglioni, L., Ganguli, M., Hall,  
1166 K., Hasegawa, K., Hendrie, H., Huang, Y., Jorm, A., Mathers, C., Menezes, P. R.,  
1167 Rimmer, E., & Sczufca, M.. (2005). Global prevalence of dementia: a Delphi  
1168 consensus study. *The Lancet*, 366(9503), 2112–2117.  
1169 [https://doi.org/10.1016/s0140-6736\(05\)67889-0](https://doi.org/10.1016/s0140-6736(05)67889-0)
- 1170 86. Reitz, C., & Mayeux, R.. (2014). Alzheimer disease: Epidemiology, diagnostic  
1171 criteria, risk factors and biomarkers. *Biochemical Pharmacology*, 88(4), 640–651.  
1172 <https://doi.org/10.1016/j.bcp.2013.12.024>
- 1173 87. Selkoe, D. J.. (2002). Alzheimer's Disease Is a Synaptic Failure. *Science*,  
1174 298(5594), 789–791. <https://doi.org/10.1126/science.1074069>
- 1175 88. Shankar, G. M., & Walsh, D. M.. (2009). Alzheimer's disease: synaptic dysfunction  
1176 and A $\beta$ . *Molecular Neurodegeneration*, 4(1), 48. <https://doi.org/10.1186/1750-1326-4-48>
- 1177
- 1178 89. Goedert, M., & Crowther, R. A.. (1989). Amyloid plaques, neurofibrillary tangles  
1179 and their relevance for the study of Alzheimer's disease. *Neurobiology of Aging*,  
1180 10(5), 405–406. [https://doi.org/10.1016/0197-4580\(89\)90076-6](https://doi.org/10.1016/0197-4580(89)90076-6)
- 1181 90. Mondragón-Rodríguez, S., Basurto-Islas, G., Santa-Maria, I., Mena, R., Binder, L.  
1182 I., Avila, J., Smith, M. A., Perry, G., & García-Sierra, F.. (2008). Cleavage and  
1183 conformational changes of tau protein follow phosphorylation during Alzheimer's  
1184 disease. *International Journal of Experimental Pathology*, 89(2), 81–90.  
1185 <https://doi.org/10.1111/j.1365-2613.2007.00568.x>
- 1186 91. Geula, C., Mesulam, M.-M., Saroff, D. M., & Wu, C.-K.. (1998). Relationship  
1187 Between Plaques, Tangles, and Loss of Cortical Cholinergic Fibers in Alzheimer  
1188 Disease. *Journal of Neuropathology & Experimental Neurology*, 57(1), 63–75.  
1189 <https://doi.org/10.1097/00005072-199801000-00008>

- 1190 92. Vogt, L. J. K., Hyman, B. T., Van Hoesen, G. W., & Damasio, A. R.. (1990).  
1191 Pathological alterations in the amygdala in Alzheimer's disease. *Neuroscience*,  
1192 37(2), 377–385. [https://doi.org/10.1016/0306-4522\(90\)90408-v](https://doi.org/10.1016/0306-4522(90)90408-v)
- 1193 93. Hyman, B.T., Van Hoesen, G.W., Damasio, A.R., & Barnes, C.L. (1984).  
1194 Alzheimer's disease: cell-specific pathology isolates the hippocampal formation.  
1195 *Science* 225, **1168–1170**
- 1196 94. Ferreira, E., Oliveira, C. R., & Pereira, C.. (2004). Involvement of endoplasmic  
1197 reticulum Ca<sup>2+</sup> release through ryanodine and inositol 1,4,5-triphosphate receptors  
1198 in the neurotoxic effects induced by the amyloid- $\beta$  peptide. *Journal of Neuroscience*  
1199 *Research*, 76(6), 872–880. <https://doi.org/10.1002/jnr.20135>
- 1200 95. Kuchibhotla, K. V., Goldman, S. T., Lattarulo, C. R., Wu, H.-Y., Hyman, B. T., &  
1201 Bacskai, B. J.. (2008). A $\beta$  Plaques Lead to Aberrant Regulation of Calcium  
1202 Homeostasis In Vivo Resulting in Structural and Functional Disruption of  
1203 Neuronal Networks. *Neuron*, 59(2), 214–225.  
1204 <https://doi.org/10.1016/j.neuron.2008.06.008>
- 1205 96. Liang, J., Kulasiri, D., & Samarasinghe, S.. (2015). Ca<sup>2+</sup> dysregulation in the  
1206 endoplasmic reticulum related to Alzheimer's disease: A review on experimental  
1207 progress and computational modeling. *Biosystems*, 134, 1–15.  
1208 <https://doi.org/10.1016/j.biosystems.2015.05.003>
- 1209 97. Plácido, A. I., Pereira, C. M. F., Duarte, A. I., Candeias, E., Correia, S. C., Santos,  
1210 R. X., Carvalho, C., Cardoso, S., Oliveira, C. R., & Moreira, P. I.. (2014). The role  
1211 of endoplasmic reticulum in amyloid precursor protein processing and trafficking:  
1212 Implications for Alzheimer's disease. *Biochimica Et Biophysica Acta (BBA) -*  
1213 *Molecular Basis of Disease*, 1842(9), 1444–1453.  
1214 <https://doi.org/10.1016/j.bbadis.2014.05.003>
- 1215 98. Renner, M., Lacor, P. N., Velasco, P. T., Xu, J., Contractor, A., Klein, W. L., &  
1216 Triller, A.. (2010). Deleterious Effects of Amyloid  $\beta$  Oligomers Acting as an  
1217 Extracellular Scaffold for mGluR5. *Neuron*, 66(5), 739–754.  
1218 <https://doi.org/10.1016/j.neuron.2010.04.029>
- 1219 99. Demuro, A., & Parker, I.. (2013). Cytotoxicity of Intracellular A $\beta$  42 Amyloid  
1220 Oligomers Involves Ca<sup>2+</sup> Release from the Endoplasmic Reticulum by Stimulated  
1221 Production of Inositol Trisphosphate. *The Journal of Neuroscience*, 33(9), 3824–  
1222 3833. <https://doi.org/10.1523/jneurosci.4367-12.2013>

- 1223 100. Del Prete, D., Checler, F., & Chami, M.. (2014). Ryanodine receptors:  
1224 physiological function and deregulation in Alzheimer disease. *Molecular*  
1225 *Neurodegeneration*, 9(1), 21. <https://doi.org/10.1186/1750-1326-9-21>
- 1226 101. Bouchard, R., Pattarini, R., & Geiger, J. D.. (2003). Presence and functional  
1227 significance of presynaptic ryanodine receptors. *Progress in Neurobiology*, 69(6),  
1228 391–418. [https://doi.org/10.1016/s0301-0082\(03\)00053-4](https://doi.org/10.1016/s0301-0082(03)00053-4)
- 1229 102. Shepherd, G. M. G., & Harris, K. M.. (1998). Three-Dimensional Structure and  
1230 Composition of CA3→CA1 Axons in Rat Hippocampal Slices: Implications for  
1231 Presynaptic Connectivity and Compartmentalization. *The Journal of Neuroscience*,  
1232 18(20), 8300–8310. <https://doi.org/10.1523/jneurosci.18-20-08300.1998>
- 1233 103. Sharp, A., Mcpherson, P., Dawson, T., Aoki, C., Campbell, K., & Snyder, S..  
1234 (1993). Differential immunohistochemical localization of inositol 1,4,5-  
1235 trisphosphate- and ryanodine-sensitive Ca<sup>2+</sup> release channels in rat brain. *The*  
1236 *Journal of Neuroscience*, 13(7), 3051–3063. [https://doi.org/10.1523/jneurosci.13-](https://doi.org/10.1523/jneurosci.13-07-03051.1993)  
1237 [07-03051.1993](https://doi.org/10.1523/jneurosci.13-07-03051.1993)
- 1238 104. Bardo, S., Cavazzini, M. G., & Emptage, N.. (2006). The role of the endoplasmic  
1239 reticulum Ca<sup>2+</sup> store in the plasticity of central neurons. *Trends in*  
1240 *Pharmacological Sciences*, 27(2), 78–84.  
1241 <https://doi.org/10.1016/j.tips.2005.12.008>
- 1242 105. Xu, J., Mashimo, T., & Südhof, T. C.. (2007). Synaptotagmin-1, -2, and -9: Ca<sup>2+</sup>  
1243 Sensors for Fast Release that Specify Distinct Presynaptic Properties in Subsets of  
1244 Neurons. *Neuron*, 54(4), 567–581. <https://doi.org/10.1016/j.neuron.2007.05.004>
- 1245 106. Dodge, F. A., Jr, & Rahamimoff, R. (1967). On the relationship between calcium  
1246 concentration and the amplitude of the end-plate potential. *The Journal of*  
1247 *physiology*, 189(2), 90–92.
- 1248 107. Yamamoto, K., & Kobayashi, M.. (2018). Opposite Roles in Short-Term Plasticity  
1249 for N-Type and P/Q-Type Voltage-Dependent Calcium Channels in GABAergic  
1250 Neuronal Connections in the Rat Cerebral Cortex. *The Journal of Neuroscience*,  
1251 38(46), 9814–9828. <https://doi.org/10.1523/jneurosci.0337-18.2018>
- 1252 108. Neves, G., Cooke, S. F., & Bliss, T. V. P.. (2008). Synaptic plasticity, memory and  
1253 the hippocampus: a neural network approach to causality. *Nature Reviews*  
1254 *Neuroscience*, 9(1), 65–75. <https://doi.org/10.1038/nrn2303>

- 1255 109. Berridge, M. J., Bootman, M. D., & Roderick, H. L.. (2003). Calcium signalling:  
1256 dynamics, homeostasis and remodelling. *Nature Reviews Molecular Cell Biology*,  
1257 4(7), 517–529. <https://doi.org/10.1038/nrm1155>
- 1258 110. Keener, J., & Sneyd, J., *Mathematical Physiology I: Cellular Physiology*. 2<sup>nd</sup> ed.  
1259 Springer Science + Busi-ness Media, LLC; 2009
- 1260 111. Dupont G, Falcke M, Kirk V, Sneyd J. *Models of Calcium Signalling*. Springer  
1261 International Publishing Switzerland; 2016.
- 1262 112. Politi, A., Gaspers, L. D., Thomas, A. P., & Höfer, T.. (2006). Models of IP3 and  
1263 Ca<sup>2+</sup> Oscillations: Frequency Encoding and Identification of Underlying  
1264 Feedbacks. *Biophysical Journal*, 90(9), 3120–3133.  
1265 <https://doi.org/10.1529/biophysj.105.072249>
- 1266 113. Goda, Y., & Stevens, C. F.. (1994). Two components of transmitter release at a  
1267 central synapse.. *Proceedings of the National Academy of Sciences*, 91(26),  
1268 12942–12946. <https://doi.org/10.1073/pnas.91.26.12942>
- 1269 114. Minicucci, J., Alford, M., Demuro, A., Gerberry, D., & Latulippe, J.. (2021).  
1270 Quantifying the dose-dependent impact of intracellular amyloid beta in a  
1271 mathematical model of calcium regulation in xenopus oocyte. *PLOS ONE*, 16(1),  
1272 e0246116. <https://doi.org/10.1371/journal.pone.0246116>
- 1273 115. Ohana, O., & Sakmann, B.. (1998). Transmitter release modulation in nerve  
1274 terminals of rat neocortical pyramidal cells by intracellular calcium buffers. *The*  
1275 *Journal of Physiology*, 513(1), 135–148. [https://doi.org/10.1111/j.1469-](https://doi.org/10.1111/j.1469-7793.1998.135by.x)  
1276 [7793.1998.135by.x](https://doi.org/10.1111/j.1469-7793.1998.135by.x)
- 1277 116. Rozov, A., Burnashev, N., Sakmann, B., & Neher, E.. (2001). Transmitter release  
1278 modulation by intracellular Ca<sup>2+</sup> buffers in facilitating and depressing nerve  
1279 terminals of pyramidal cells in layer 2/3 of the rat neocortex indicates a target cell-  
1280 specific difference in presynaptic calcium dy. *The Journal of Physiology*, 531(3),  
1281 807–826. [https://doi.org/10.1111/j.1469-](https://doi.org/10.1111/j.1469-7793.2001.0807h.x)  
1282 [7793.2001.0807h.x](https://doi.org/10.1111/j.1469-7793.2001.0807h.x)
- 1283 117. Ullah, G., & Jung, P.. (2006). Modeling the Statistics of Elementary Calcium  
1284 Release Events. *Biophysical Journal*, 90(10), 3485–3495.  
<https://doi.org/10.1529/biophysj.105.073460>
- 1285 118. Pijnenburg, Y. A. L., Vd Made, Y., Van Cappellen Van Walsum, A. M., Knol, D.  
1286 L., Scheltens, P., & Stam, C. J.. (2004). EEG synchronization likelihood in mild  
1287 cognitive impairment and Alzheimer's disease during a working memory task.

- 1288 Clinical Neurophysiology, 115(6), 1332–1339.  
1289 <https://doi.org/10.1016/j.clinph.2003.12.029>
- 1290 119. Grady, C. L.. (2001). Altered brain functional connectivity and impaired short-term  
1291 memory in Alzheimer's disease. *Brain*, 124(4), 739–756.  
1292 <https://doi.org/10.1093/brain/124.4.739>
- 1293 120. Snyder, E. M., Nong, Y., Almeida, C. G., Paul, S., Moran, T., Choi, E. Y., Nairn,  
1294 A. C., Salter, M. W., Lombroso, P. J., Gouras, G. K., & Greengard, P.. (2005).  
1295 Regulation of NMDA receptor trafficking by amyloid- $\beta$ . *Nature Neuroscience*,  
1296 8(8), 1051–1058. <https://doi.org/10.1038/nn1503>
- 1297 121. Pinsky, P. F., & Rinzel, J.. (1995). Synchrony measures for biological neural  
1298 networks. *Biological Cybernetics*, 73(2), 129–137.  
1299 <https://doi.org/10.1007/bf00204051>
- 1300 122. Stern, E. A.. (2004). Cortical Synaptic Integration In Vivo Is Disrupted by  
1301 Amyloid-Plaques. *The Journal of Neuroscience*, 24(19), 4535–4540.  
1302 <https://doi.org/10.1523/jneurosci.0462-04.2004>
- 1303 123. Strogatz, S. H., & Mirollo, R. E.. (1991). Stability of incoherence in a population  
1304 of coupled oscillators. *Journal of Statistical Physics*, 63(3-4), 613–635.  
1305 <https://doi.org/10.1007/bf01029202>
- 1306 124. Leissring, M. A., Paul, B. A., Parker, I., Cotman, C. W., & Laferla, F. M.. (2008).  
1307 Alzheimer's Presenilin-1 Mutation Potentiates Inositol 1,4,5-Trisphosphate-  
1308 Mediated Calcium Signaling in *Xenopus*. *Journal of Neurochemistry*, 72(3), 1061–  
1309 1068. <https://doi.org/10.1111/j.1471-4159.1999.721061.x>
- 1310 125. Kopell, N., Börgers, C., Pervouchine, D., Malerba, P., Tort, A. (2010). Gamma and  
1311 Theta Rhythms in Biophysical Models of Hippocampal Circuits. In: *Hippocampal*  
1312 *Microcircuits: A computational Modeler's Resource Book*, edited by Cutsuridis V,  
1313 Graham B, Cobb S, Vida I. New York: Springer, 423–457
- 1314 126. Khachaturian, Z. S.. (2017). Calcium Hypothesis of Alzheimer's disease and brain  
1315 aging: A framework for integrating new evidence into a comprehensive theory of  
1316 pathogenesis. *Alzheimer's & Dementia*, 13(2), 178.  
1317 <https://doi.org/10.1016/j.jalz.2016.12.006>
- 1318 127. Demuro, A., Mina, E., Kaye, R., Milton, S. C., Parker, I., & Glabe, C. G.. (2005).  
1319 Calcium Dysregulation and Membrane Disruption as a Ubiquitous Neurotoxic  
1320 Mechanism of Soluble Amyloid Oligomers\* $\diamond$ . *Journal of Biological*  
1321 *Chemistry*, 280(17), 17294–17300. <https://doi.org/10.1074/jbc.m500997200>



- 1322 128. Cheung, K.-H., Mei, L., Mak, D.-O. D., Hayashi, I., Iwatsubo, T., Kang, D. E., &  
1323 Foskett, J. K.. (2010). Gain-of-Function Enhancement of IP 3 Receptor Modal  
1324 Gating by Familial Alzheimer's Disease-Linked Presenilin Mutants in Human  
1325 Cells and Mouse Neurons. *Science Signaling*, 3(114), ra22–ra22.  
1326 <https://doi.org/10.1126/scisignal.2000818>
- 1327 129. Stutzmann, G. E.. (2006). Enhanced Ryanodine Receptor Recruitment Contributes  
1328 to Ca<sup>2+</sup> Disruptions in Young, Adult, and Aged Alzheimer's Disease Mice. *The*  
1329 *Journal of Neuroscience*, 26(19), 5180–5189.  
1330 <https://doi.org/10.1523/jneurosci.0739-06.2006>
- 1331 130. Sudhof, T. C.. (2012). Calcium Control of Neurotransmitter Release. *Cold Spring*  
1332 *Harbor Perspectives in Biology*, 4(1), a011353–a011353.  
1333 <https://doi.org/10.1101/cshperspect.a011353>
- 1334 131. Eshra, A., Schmidt, H., Eilers, J., & Hallermann, S.. (2021). Calcium dependence  
1335 of neurotransmitter release at a high fidelity synapse. *Elife*, 10.  
1336 <https://doi.org/10.7554/elife.70408>
- 1337 132. Delvendahl, I., Weyhersmüller, A., Ritzau-Jost, A., & Hallermann, S.. (2013).  
1338 Hippocampal and cerebellar mossy fibre boutons - same name, different  
1339 function. *The Journal of Physiology*, 591(13), 3179–3188.  
1340 <https://doi.org/10.1113/jphysiol.2012.248294>
- 1341 133. Riascos, D., De Leon, D., Baker-Nigh, A., Nicholas, A., Yukhananov, R., Bu, J.,  
1342 Wu, C.-K., & Geula, C.. (2011). Age-related loss of calcium buffering and selective  
1343 neuronal vulnerability in Alzheimer's disease. *Acta Neuropathologica*, 122(5),  
1344 565–576. <https://doi.org/10.1007/s00401-011-0865-4>
- 1345 134. Kook, S.-Y., Jeong, H., Kang, M. J., Park, R., Shin, H. J., Han, S.-H., Son, S. M.,  
1346 Song, H., Baik, S. H., Moon, M., Yi, E. C., Hwang, D., & Mook-Jung, I.. (2014).  
1347 Crucial role of calbindin-D28k in the pathogenesis of Alzheimer's disease mouse  
1348 model. *Cell Death & Differentiation*, 21(10), 1575–1587.  
1349 <https://doi.org/10.1038/cdd.2014.67>
- 1350 135. Miguel, J. C., Perez, S. E., Malek-Ahmadi, M., & Mufson, E. J. (2021). Cerebellar  
1351 Calcium-Binding Protein and Neurotrophin Receptor Defects in Down Syndrome  
1352 and Alzheimer's Disease. *Frontiers in aging neuroscience*, 13, 645334.  
1353 <https://doi.org/10.3389/fnagi.2021.645334>

- 1354 136. Pchitskaya, E., Popugaeva, E., & Bezprozvanny, I.. (2018). Calcium signaling and  
1355 molecular mechanisms underlying neurodegenerative diseases. *Cell Calcium*, 70,  
1356 87–94. <https://doi.org/10.1016/j.ceca.2017.06.008>
- 1357 137. De Young, G. W., & Keizer, J.. (1992). A single-pool inositol 1,4,5-trisphosphate-  
1358 receptor-based model for agonist-stimulated oscillations in  $Ca^{2+}$   
1359 concentration.. *Proceedings of the National Academy of Sciences*, 89(20), 9895–  
1360 9899. <https://doi.org/10.1073/pnas.89.20.9895>
- 1361 138. Shuai, J., Pearson, J. E., Foskett, J. K., Mak, D.-O. D., & Parker, I.. (2007). A  
1362 Kinetic Model of Single and Clustered IP<sub>3</sub> Receptors in the Absence of  $Ca^{2+}$   
1363 Feedback. *Biophysical Journal*, 93(4), 1151–1162.  
1364 <https://doi.org/10.1529/biophysj.107.108795>
- 1365 139. Ullah, G., Daniel Mak, D.-O., & Pearson, J. E.. (2012). A data-driven model of a  
1366 modal gated ion channel: The inositol 1,4,5-trisphosphate receptor in insect Sf9  
1367 cells. *Journal of General Physiology*, 140(2), 159–173.  
1368 <https://doi.org/10.1085/jgp.201110753>
- 1369 140. Cai, Q., & Tammineni, P.. (2017). Mitochondrial Aspects of Synaptic Dysfunction  
1370 in Alzheimer’s Disease. *Journal of Alzheimer's Disease*, 57(4), 1087–1103.  
1371 <https://doi.org/10.3233/jad-160726>
- 1372 141. Du, H., Guo, L., Yan, S., Sosunov, A. A., Mckhann, G. M., & Shidu Yan, S. (2010).  
1373 Early deficits in synaptic mitochondria in an Alzheimer's disease mouse  
1374 model. *Proceedings of the National Academy of Sciences*, 107 (43), 18670–18675  
1375 <https://doi.org/10.1073/pnas.1006586107>  
1376  
1377  
1378  
1379  
1380  
1381  
1382  
1383
