# Supplementary material for: Upregulated Ca2+ release from the endoplasmic reticulum leads to impaired presynaptic function in Alzheimer’s disease
Source: bioRxiv or medRxiv preprint supplement (doi:10.1101/2022.04.21.489060), 2022-04-22
Supplement: Supplementary file [file media-1.pdf]

## Supplementary Figures

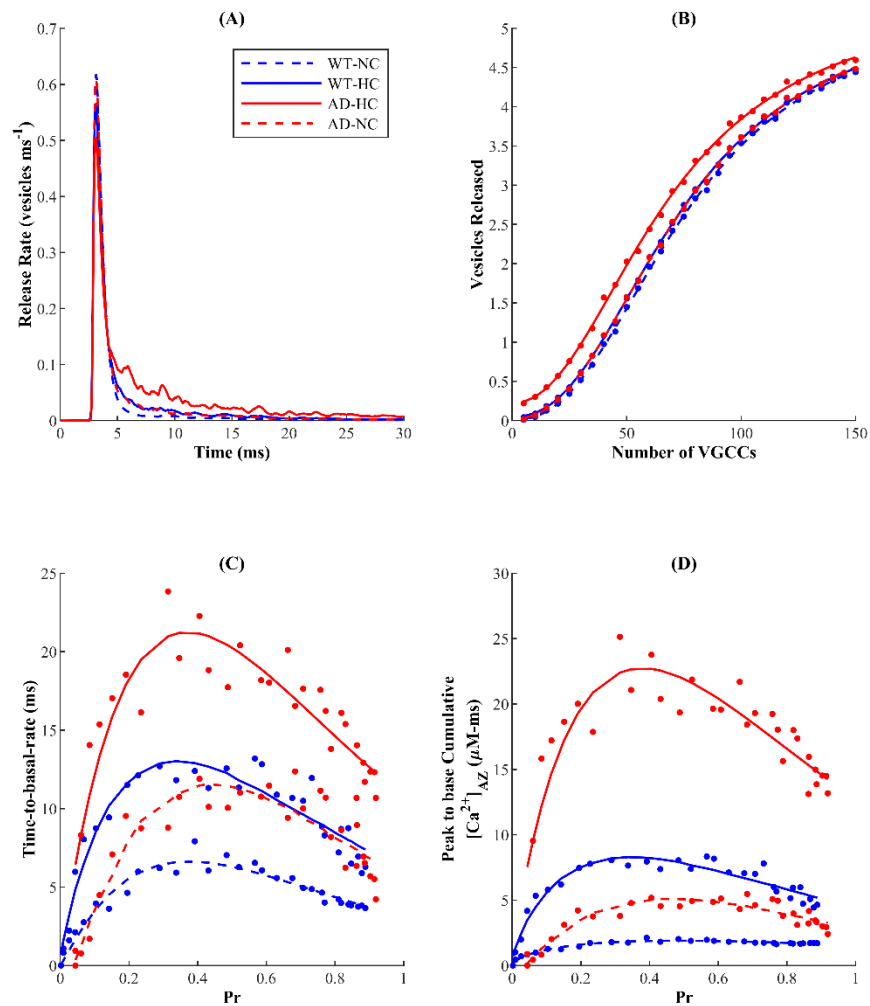

**SI Figure 1.** Coupling between the microdomains around  $IP_3Rs$  and VGCCs influences  $Ca^{2+}$  in the AZ and neurotransmission profiles in AD and WT synapses. Transmitter release rates within 30 ms of stimulus (A) and total vesicles released (B) for different coupling configurations. Decay time of peak release rate (C) and cumulative  $Ca^{2+}$  concentration from peak to basal rate in the AZ (D) are markedly influenced by coupling.

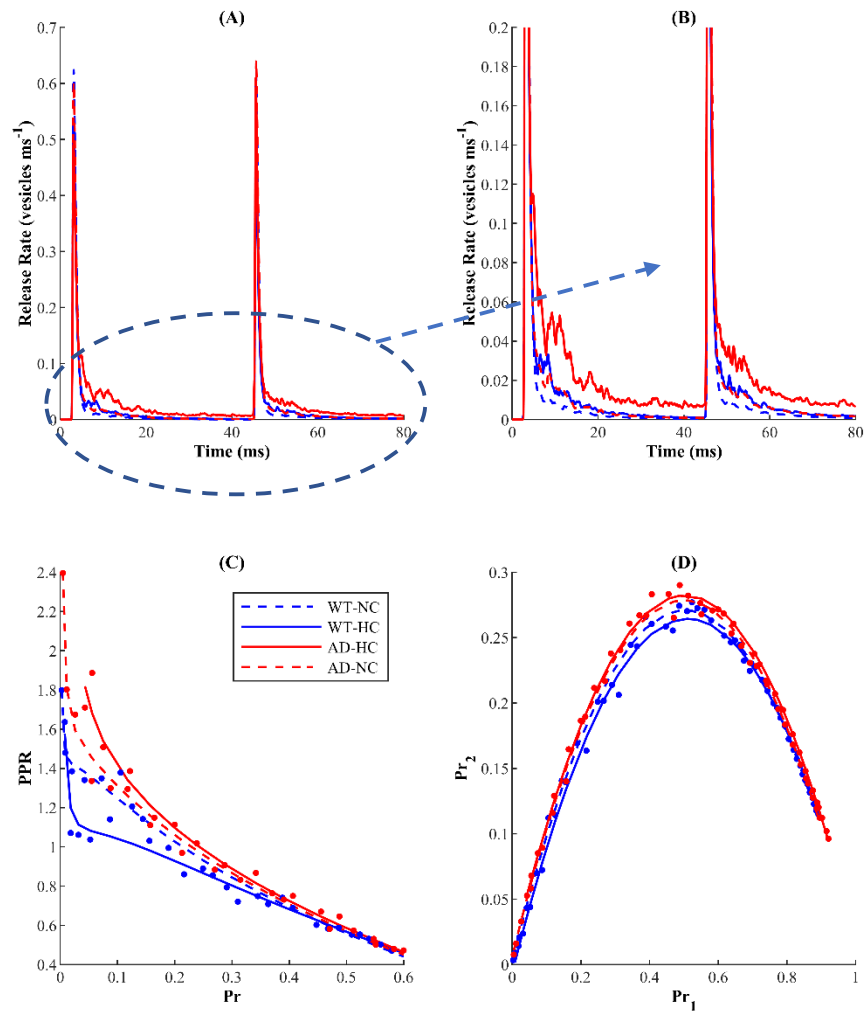

**SI Figure 2.** Stronger coupling between the microdomain of  $IP_3Rs$  cluster and AZ exacerbate the release rate and enhanced PPR in AD-affected synapses but only marginally affect the bell-shaped behavior of  $Pr_2$  as a function of  $Pr_1$ . Release profile (A) (zoomed-in (B)) following paired-pulse stimulation protocol shows an increase in release rate by stronger coupling in the microdomain of  $IP_3Rs$  cluster and AZ in both WT and AD-affected synapses. (C) The enhanced PPR in AD-affected synapses with respect to WT synapses is exacerbated by stronger coupling. (D) Pr in response to the second pulse ( $Pr_2$ ) as a function of Pr following the first pulse ( $Pr_1$ ) shows that the bell-shaped response is marginally affected by the coupling strength.

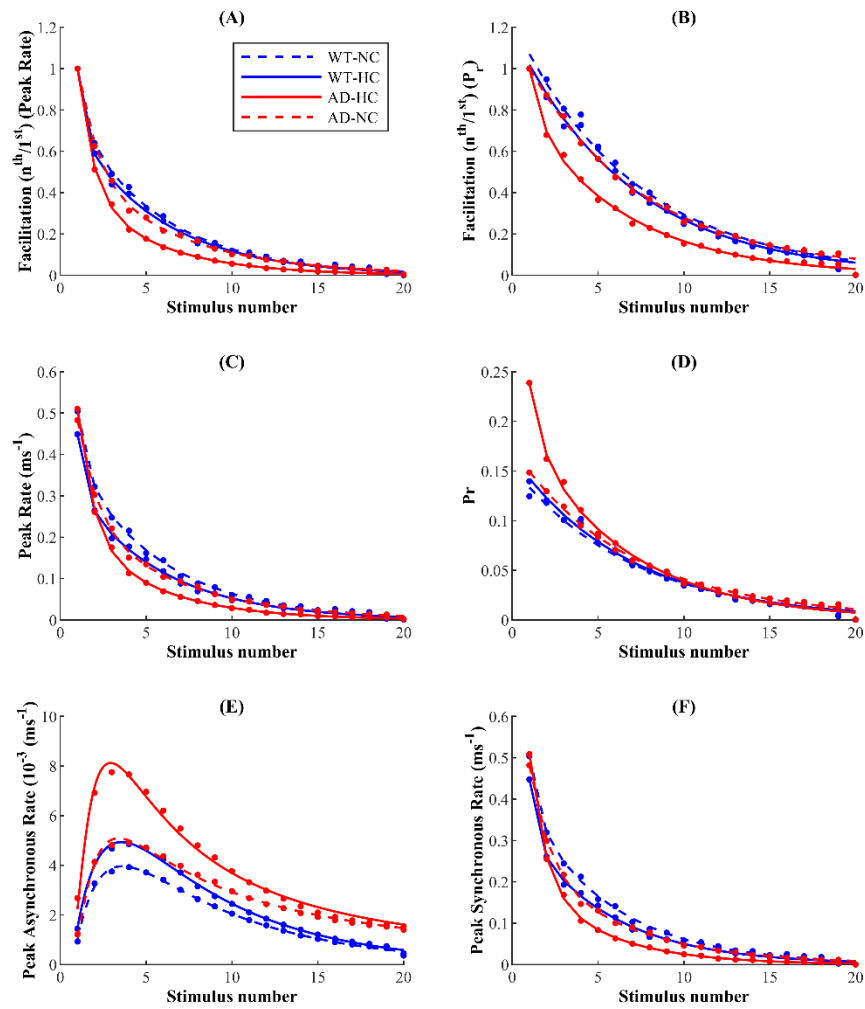

**SI Figure 3.** Stronger coupling between the microdomain of  $IP_3Rs$  cluster and AZ exacerbate the stronger depression in AD-affected synapses. Facilitation obtained from peak rate (A) and  $P_r$  (B) shows that HC enhances the synaptic depression in AD-affected synapses. Peak release rate (C) and  $P_r$  (D) following each AP in the train under different coupling conditions. (E) Asynchronous and (H) peak synchronous release under different coupling conditions.

---
